1 Article

2

3 **A schizophrenia risk gene, *NRGN*, bidirectionally modulates synaptic plasticity via**  
4 **regulating the neuronal phosphoproteome**

5

6 Hongik Hwang<sup>1,3,8\*</sup>, Matthew J. Szucs<sup>5,7</sup>, Lei J. Ding<sup>1,4,7</sup>, Andrew Allen<sup>5</sup>, Henny Haengen<sup>1</sup>, Fan  
7 Gao<sup>1</sup>, Arturo Andrade<sup>6</sup>, Jennifer Q. Pan<sup>5</sup>, Steven A. Carr<sup>5</sup>, Rushdy Ahmad<sup>5</sup> and Weifeng Xu<sup>1,2\*</sup>

8

9 <sup>1</sup>Picower Institute for Learning and Memory, <sup>2</sup>Department of Brain and Cognitive Sciences,  
10 <sup>3</sup>Department of Chemistry, <sup>4</sup>Department of Biology, Massachusetts Institute of Technology, 77  
11 Massachusetts Avenue, Cambridge, MA 02139. <sup>5</sup>Broad Institute of MIT and Harvard, 415 Main  
12 Street, Cambridge, MA 02139. <sup>6</sup>Department of Biological Sciences, University of New  
13 Hampshire, Durham, NH 03824. <sup>7</sup>These authors contributed equally. <sup>8</sup>Present address: Center  
14 for Neuroscience, Brain Science Institute, Korea Institute of Science and Technology (KIST),  
15 Seoul 02792, Korea.

16 \*Correspondence should be addressed to H.H ([hongik@mit.edu](mailto:hongik@mit.edu)) and W.X. ([weifeng@mit.edu](mailto:weifeng@mit.edu))

17

18 **Abstract**

19 *NRGN* is a schizophrenia risk gene identified in recent genetic studies, encoding a small  
20 neuronal protein, neurogranin (Ng). Individuals carrying a risk variant of *NRGN* showed  
21 decreased hippocampal activation during contextual fear conditioning. Furthermore, the  
22 expression of Ng was reduced in the post-mortem brains of schizophrenic patients. Using the  
23 mouse model, we found that the translation of Ng in hippocampus is rapidly increased in  
24 response to novel context exposure, and this up-regulation is required for encoding contextual  
25 memory. The extent and degree of the effect that altered Ng expression has on neuronal  
26 cellular functions are largely unknown. Here, we found that Ng bidirectionally regulates synaptic  
27 plasticity in the hippocampus. Elevated Ng levels facilitated long-term potentiation (LTP),  
28 whereas decreased Ng levels impaired LTP. Quantitative phosphoproteomic analysis revealed  
29 that decreasing Ng caused a significant shift in the phosphorylation status of postsynaptic  
30 density proteins, highlighting clusters of schizophrenia- and autism-related genes. In particular,  
31 decreasing Ng led to the hypo-phosphorylation of NMDAR subunit Grin2A at newly identified  
32 sites, resulting in accelerated decay of NMDAR-mediated channel currents. blocking protein  
33 phosphatase PP2B activity rescued the accelerated synaptic NMDAR current decay and the  
34 impairment of LTP caused by decreased Ng levels, suggesting that enhanced synaptic PP2B  
35 activity led to the deficits. Taken together, our work suggests that altered Ng levels under  
36 pathological conditions affect the phosphorylation status of neuronal proteins by tuning PP2B  
37 activity and thus the induction of synaptic plasticity, revealing a novel mechanistic link of a  
38 schizophrenia risk gene to cognitive deficits.

## 39 Introduction

40 Schizophrenia, affecting about 1% of the population worldwide, is a chronic mental  
41 disorder with psychotic symptoms, such as delusions, hallucinations and disorganized thinking<sup>1</sup>.  
42 Schizophrenia is one of the top leading causes of disability worldwide<sup>2</sup>, and affected individuals  
43 suffer from difficulty in social relationships, motor impairment, and cognitive dysfunction, which  
44 severely interferes with the patients' daily functioning. Individuals with schizophrenia have an  
45 increased risk of premature mortality, and about 5% of the patients die by suicide<sup>3</sup>.  
46 Antipsychotic medications are commonly used to ease psychotic symptoms. However, available  
47 symptomatic treatments are only partially effective, and lifelong treatment is required.

48 A combination of physical, genetic, psychological and environmental factors is thought to  
49 contribute to the development of schizophrenia, but the exact pathophysiology is unknown.  
50 However, the highly heritable nature of schizophrenia implies a significant role of inherited  
51 genetic variants in the etiology<sup>4, 5</sup>. Genome-wide association studies reported more than 100  
52 genetic loci associated with schizophrenia<sup>6-14</sup>, and the neurogranin (Ng, gene name: *NRGN*)  
53 gene has been identified as one of schizophrenia risk genes with top associations in different  
54 patients population across the world<sup>6, 7, 15-17</sup>. rs12807809 is a single-nucleotide polymorphism  
55 located 3,457 bases upstream from the promoter region of *NRGN* at 11q24.2. In functional  
56 magnetic resonance imaging (fMRI) studies, individuals carrying the risk variant showed  
57 significantly decreased activation in the hippocampus during contextual learning<sup>18</sup>, and  
58 widespread cortical thinning and thalamic shape abnormalities<sup>19</sup>. Moreover, a recent  
59 interactome analysis of another schizophrenia risk gene, *ZNF804A*, identified *NRGN* as one of  
60 its significant targets<sup>20</sup>.

61 Using the mouse model, our group recently reported that the translation of Ng is rapidly  
62 increased in response to neuronal activity, and this up-regulation is required for contextual  
63 memory formation<sup>21</sup>. Cognitive impairment is a core feature of the pathophysiology of

64 schizophrenia, and reduced Ng immunoreactivity was observed in the prefrontal cortex regions  
65 of post-mortem brain tissues from schizophrenia patients<sup>22</sup>, suggesting that dysregulated Ng  
66 expression may contribute to the cognitive impairment in schizophrenia. Dysregulation of Ng  
67 expression has also been observed in Alzheimer's disease<sup>23, 24</sup>, and the deletion of a  
68 chromosomal region containing the Ng gene causes a rare genetic disorder with symptoms of  
69 mental retardation, known as Jacobsen syndrome<sup>25</sup>. Ng levels are also dynamically regulated  
70 during development under different environmental and behavioral states<sup>26-28</sup>. Together, these  
71 evidences suggest that Ng is involved in cognitive impairment associated with  
72 neurodegenerative, neuropsychiatric and neurodevelopmental diseases.

73 Ng belongs to a family of small neuronal proteins, called calpactins, which binds to a  
74 calcium-free form of calmodulin (CaM) via the IQ (isoleucine and glutamine-containing) domain.  
75 Among the calpactins, Ng is uniquely expressed at high levels in the soma, dendrite and the  
76 postsynaptic compartment of the principal neurons in the cerebral cortex, hippocampus<sup>26, 27</sup> and  
77 other brain regions important for experience-dependent plasticity including striatum and  
78 amygdala (Allen Brain Atlas)<sup>29, 30</sup>. CaM is released from Ng upon an increase in intracellular  
79 Ca<sup>2+</sup> concentrations, and it is thought that Ng levels titrate the availability of CaM in the  
80 postsynaptic compartment of excitatory synapses in principal neurons<sup>31, 32</sup>.

81 CaM is a key signal transducer that detects the increase in cytosolic Ca<sup>2+</sup> levels, which  
82 mediates Ca<sup>2+</sup>/CaM-dependent signaling events. The relative activation of Ca<sup>2+</sup>/CaM-dependent  
83 protein kinase II (CaMKII) and protein phosphatase 2B (PP2B, also known as calcineurin) at the  
84 postsynaptic compartment is considered to determine the direction of long-term potentiation  
85 (LTP), the cellular basis of learning and memory (Supplementary Fig. 1a)<sup>33-41</sup>. This view is in  
86 accordance with the push-pull mechanism that has been proposed for controlling the  
87 directionality and efficacy of synaptic plasticity<sup>42-44</sup>. Although both CaMKII and PP2B enzymes  
88 are activated by Ca<sup>2+</sup>/CaM complex, PP2B is preferentially activated when the amount of CaM



89 is limited due to its much higher binding affinity for the  $\text{Ca}^{2+}/\text{CaM}$  complex. In contrast, CaMKII  
90 is much more abundant than PP2B in the postsynaptic compartment, and thus CaMKII activity  
91 becomes dominant when the amount of  $\text{Ca}^{2+}/\text{CaM}$  complex is sufficient<sup>45-47</sup>. Therefore, the  
92 expression of synaptic plasticity is highly sensitive to a change in CaM availability, and it was  
93 hypothesized that Ng controls synaptic plasticity by regulating CaM availability and  $\text{Ca}^{2+}/\text{CaM}$   
94 dynamics at the central excitatory synapses (Fig. 1a)<sup>48, 49</sup>. Consistent with the hypothesis,  
95 cortical neurons lacking Ng exhibit altered  $\text{Ca}^{2+}$  dynamics<sup>50, 51</sup>. However, previous studies with  
96 independently generated Ng knockout mice showed the contradicting effects in hippocampal  
97 LTP<sup>50, 52, 53</sup>, and results in young organotypic hippocampal slice cultures showed that elevated  
98 Ng levels occlude LTP under a standard pairing induction protocol, but facilitate LTP under a  
99 weaker pairing protocol<sup>54, 55</sup>. These data suggest that depending on the age, potentially genetic  
100 background and neural activity, Ng regulates synaptic plasticity differently. It is likely that a  
101 signaling network, rather than a single node in a particular pathway accounts for the  
102 mechanisms of LTP expression<sup>56-62</sup>. Moreover, recent genetic studies have revealed strong  
103 associations of genes involved in synaptic plasticity with neuropsychiatric and  
104 neurodevelopmental disorders, suggesting an intricate molecular interplay tuning synaptic  
105 plasticity critical for learning and memory<sup>6, 63, 64</sup>. It is therefore important to control the  
106 manipulation at defined developmental stage to be able to examine the scope and impact of Ng-  
107 dependent regulation on  $\text{Ca}^{2+}/\text{CaM}$ -mediated signaling cascades and downstream targets and  
108 gain a comprehensive view of the molecular processes involved in synaptic plasticity.

109 In this study, we used lentiviral-mediated gene transfer to manipulate Ng levels in CA1  
110 neurons in adult brains, and sought to determine the influence of altered Ng levels on synaptic  
111 plasticity in the hippocampus, and found that Ng bidirectionally regulates spike-timing-  
112 dependent LTP at Schaffer collateral (SC) to CA1 synapses. To unbiasedly identify the  
113 underlying molecular mechanism, we applied quantitative phosphoproteomic analysis<sup>65-</sup>

114 <sup>67</sup>(Supplementary Fig. 1b), to reveal the molecular networks underlying the bidirectional control  
115 of LTP. That reduced Ng levels caused a significant shift in the phosphoproteome of  
116 postsynaptic density proteins, highlighting autism- and schizophrenia-associated gene targets.  
117 With further functional validation, our results suggest that altered Ng expression observed in  
118 neurodegenerative and neuropsychiatric diseases negatively affects the phosphorylation status  
119 of neuronal proteins including the NMDAR subunit Grin2A, by tuning synaptic PP2B activity,  
120 hence the induction and expression of synaptic plasticity, as an underlying cellular  
121 pathomechanism for the cognitive deficits in these diseases.

122

123 **Results**

124 **Ng overexpression facilitates spike-timing-dependent LTP via direct interaction with CaM.**

125 To elucidate the role of Ng in synaptic plasticity, we used lentivirus-mediated  
126 manipulation of Ng levels in mouse hippocampal CA1 neurons, which allows post-  
127 developmental, postsynaptic neuron-specific manipulation and prevents potential complications  
128 resulting from developmental compensation. For Ng overexpression (Ng OE), a lentiviral  
129 construct to overexpress Ng was created using an ubiquitin promoter to drive the expression of  
130 Ng fused to GFP (Ng OE, Fig. 1b), and the robust expression of Ng-GFP fusion protein was  
131 confirmed by western blot (Fig. 1c). To manipulate the expression levels of Ng in CA1 neurons  
132 *in vivo*, we injected a concentrated lentivirus into the hippocampal CA1 region of 7-week-old  
133 C57BL/6 male mice by stereotaxic surgery. Acute hippocampal slices were prepared 5-9 days  
134 after the injection for electrophysiology recordings, and the lentiviral infection in the CA1 area  
135 was confirmed by GFP fluorescence (Fig. 1d). To examine the effect of Ng OE on the basal  
136 synaptic transmission, paired-pulse ratio (PPR) and AMPAR/NMDAR excitatory postsynaptic  
137 currents ratio (A/N ratio) at SC-CA1 synapses were recorded from uninfected cells (control) and  
138 infected cells from the same animals. Both PPR and A/N ratios were not significantly different  
139 between uninfected and infected neurons (Fig. 1e, f), indicating that increased levels of Ng in  
140 CA1 neurons do not alter presynaptic release probability and relative basal synaptic  
141 transmission at hippocampal SC-CA1 synapses under the basal condition.

142 The effect of elevated Ng levels on synaptic plasticity was examined using the spike-  
143 timing-dependent plasticity (STDP) protocol for LTP induction<sup>68</sup>. An individual pairing consisted  
144 of a presynaptic stimulation followed by a train of four action potentials repeated 100 times at 5  
145 Hz (Fig. 1g). The relative timing between pre- and postsynaptic stimulations is a critical factor  
146 controlling plasticity for stimulated synapses<sup>69, 70</sup>. When the pairing was performed at a 10-ms  
147 interval, both uninfected and infected neurons expressed robust LTP with a similar degree (Fig.

148 1h-k), indicating that increased Ng levels exert no additional effects on the magnitude of LTP  
149 when the induction protocol with the 10-ms pairing interval is used, and endogenous Ng levels  
150 are sufficient to support the expression of STDP-LTP.

151 We then examined the effect of Ng OE on STDP-LTP under a weaker induction  
152 condition, and a prolonged pairing interval is known to drive less cooperated activity between  
153 presynaptic release and postsynaptic membrane depolarization. When the pairing interval was  
154 increased to 20 ms, the pairing protocol no longer induced LTP in control cells (Fig 2a, g, h),  
155 whereas neurons with Ng OE showed robust LTP expression (Fig. 2b, g, h). This result  
156 indicates that increased Ng levels allow the expression of STDP-LTP with the prolonged pairing  
157 interval, and Ng facilitates the induction of STDP-LTP by broadening the temporal association  
158 window.

159 To test whether this facilitative effect is mediated by the direct interaction between Ng and CaM,  
160 a mutant form of Ng was created in which the CaM-binding IQ motif is deleted (Fig. 2c, d,  
161 Ng $\Delta$ IQ). HEK cells were transiently transfected with a construct expressing either wildtype Ng or  
162 Ng $\Delta$ IQ, and the cell lysates were incubated with beads coated with purified CaM to confirm the  
163 specific and Ca<sup>2+</sup>-dependent interaction between CaM and Ng. In agreement with previous  
164 studies, wildtype Ng was preferentially bound to CaM under the low Ca<sup>2+</sup> condition (EGTA), but  
165 Ng $\Delta$ IQ did not interact with CaM regardless of a change in Ca<sup>2+</sup> concentrations (Fig. 2e),  
166 confirming that Ng directly interacts with CaM through the IQ motif. As expected, when the  
167 Ng $\Delta$ IQ mutant was overexpressed in CA1 neurons, the induction protocol with a 20-ms interval  
168 was not able to trigger LTP (Fig. 2f-h), suggesting that the interaction with CaM is critical for the  
169 facilitative effect of Ng on the induction of LTP.

#### 170 **Ng knockdown abolishes the induction of STDP-LTP at SC-CA1 synapses.**

171 We next asked whether the Ng-dependent regulation of STDP-LTP is bidirectional. For  
172 Ng knockdown (Ng KD), a lentiviral vector with dual promoters was constructed, in which the H1

173 promoter drives the expression of shRNA targeting endogenous Ng mRNAs and the ubiquitin  
174 promoter drives the simultaneous expression of GFP as an infection marker (Fig. 3a, Ng KD).  
175 The knockdown of Ng was highly effective 7-10 days after viral infection when tested by western  
176 blot in dissociated cortical neuron culture (Fig. 3b, control bands are the same as those in Fig.  
177 1c, as GFP-infected cultures were used as controls for both conditions in one preparation). PPR  
178 and A/N ratio were recorded from both uninfected control cells and infected cells from the same  
179 animals, and Ng KD did not significantly affect PPR and A/N ratio at SC-CA1 synapses (Fig. 3c,  
180 d), indicating that presynaptic release probability and basal synaptic transmission remain intact  
181 at SC-CA1 synapses.

182 The effect of decreased Ng levels on STDP-LTP was examined using the pairing  
183 protocol with 10-ms pairing interval, and a robust LTP was expressed in non-infected control  
184 neurons (Fig. 3e, g, h). Conversely, the induction of LTP was completely abolished in neurons  
185 infected with Ng KD (Fig. 3f-h), indicating the essential role of Ng for STDP-LTP expression.

186 **Decreased Ng levels cause a significant shift in the postsynaptic phosphoproteome,**  
187 **including hypo-phosphorylation of NMDAR subunit Grin2A.**

188 Given the role of Ng in regulating CaM availability as well as  $Ca^{2+}$ /CaM dynamics, we  
189 hypothesized that Ng KD influences the activation of  $Ca^{2+}$ /CaM-dependent kinases and  
190 phosphatases, thereby leading to a global change in protein phosphorylation as well as altered  
191 synaptic plasticity. To examine the overall changes in the phosphoproteome, we enriched  
192 phosphopeptides using immobilized metal affinity chromatography (IMAC) from total cell lysates  
193 prepared from dissociated neuronal cultures infected with either GFP or Ng KD lentiviruses at  
194 DIV 7 and collected at DIV 17. Both total proteome and phosphoproteome were analyzed using  
195 quantitative mass spectrometry with isobaric labeling of peptides as previously described (Fig.  
196 4a)<sup>71, 72</sup>. The phosphoproteome data were normalized to the total proteome when the proteins  
197 were confidently identified in the total proteome dataset (Supplementary Table 1). Nearly 30,000

198 phosphorylation sites (p-sites) comprising of 5,485 proteins identified in the proteome were  
199 analyzed. 4,744 (~16%) of these p-sites derived from 2,413 proteins exhibited a significant  
200 change in their phosphorylation status compared to the control (Fig. 4b,  $FDR \leq 0.05$ ). These  
201 data show that decreasing Ng levels in neurons induced a significant shift in the  
202 phosphoproteome landscape.

203 Using the hypergeometric test, we found that differentially regulated p-sites in the  
204 phosphoproteome dataset were significantly over-represented in the set of known postsynaptic  
205 density (PSD) proteins ( $p < 2 \times 10^{-11}$ , Supplementary Table 1)<sup>73</sup>. Specifically, 26% of the proteins  
206 with significantly down-regulated p-sites overlapped with the PSD proteomic dataset (~29% of  
207 all significantly down-regulated p-sites), and 27% of the proteins with significantly up-regulated  
208 p-sites overlapped with the PSD proteomic dataset (~33% of all significantly up-regulated p-  
209 sites) (Supplementary Table 1), indicating that decreasing Ng levels significantly shifted the  
210 phosphorylation state of postsynaptic components. To further determine which cellular functions  
211 are most directionally affected under Ng KD, we performed GO enrichment analysis<sup>74, 75</sup>,  
212 separately on the sets of up- and down-phosphorylated PSD proteins using the clusterProfiler R  
213 package<sup>76</sup>. Notably, pathways related with protein kinase binding were highlighted in both of the  
214 up- and down-regulated clusters. Also, ion transport and ion channel binding clusters were  
215 highlighted in the set with down-regulated phosphorylation (Fig. 4c).

216 Given the association of Ng with mental retardation and schizophrenia, and the  
217 convergence of the glutamatergic synaptic components in schizophrenia and autism spectrum  
218 disorders (ASDs), we questioned whether the changes in Ng levels influence the  
219 phosphorylation states of ASD- and schizophrenia-associated gene targets. In order to answer  
220 this question, we took the human ASD gene list from SFARI  
221 ([https://gene.sfari.org/autdb/HG\\_Home.do](https://gene.sfari.org/autdb/HG_Home.do)) with category scores  $\leq 4$ . Among the 460 genes  
222 included in the list, 427 were converted to mouse genes and compared with the list from our

223 proteomics analysis (Fig. 4d, left). 256 (60%) of 427 were identified in the phosphoproteome  
224 data, and 37.9% of the gene targets were identified (97 out of 256) with significant changes in  
225 phosphorylation states with Ng KD. The list of genes with phosphorylation sites are shown in  
226 Supplementary Table 2, clustered using DAVID functional annotation<sup>77, 78</sup>. Notably, synaptic  
227 components and ion channels were highlighted, indicating the overlap of ASD targets and  
228 phosphoproteome changes induced by Ng KD.

229 In addition, we also took the candidate genes from the 108 Loci associated with  
230 schizophrenia<sup>6</sup>. Among 333 extracted human genes, 241 of them were converted into mouse  
231 genes. 111 (46%) of these were identified in the phosphoproteome, in which 29 (26%) were  
232 identified with significant changes in phosphorylation states with Ng KD (Fig. 4d, right;  
233 Supplementary Table 3). Importantly, among the proteins whose phosphorylation states were  
234 significantly altered by Ng KD, seven targets were associated with both ASD and schizophrenia  
235 (Fig. 4e), highlighting a potential convergence of the pathomechanisms of ASD and  
236 schizophrenia. Out of these identified targets, the NMDAR subunit Grin2A (also known as NR2A,  
237 GluN2A) was of particular interest, given its important role in conducting Ca<sup>2+</sup> ions critical for  
238 NMDAR-dependent plasticity<sup>79-81</sup>. We identified several phosphorylation sites in the C-terminal  
239 region of Grin2A that were significantly affected by Ng KD. In particular, Grin2A S1384, a  
240 previously uncharacterized phosphorylation site, was hypo-phosphorylated by Ng KD. In  
241 addition, the phosphorylation site Grin2A S882/S890 was significantly hyper-phosphorylated. To  
242 further examine the overall change in phosphorylation status of Grin2A in the Ng KD condition,  
243 we used a Phos-Tag SDS-PAGE gel system, which separates a protein based on the degree of  
244 phosphorylation levels<sup>82, 83</sup>, and revealed that Ng KD shifted the phosphorylation pattern of  
245 Grin2A toward the hypo-phosphorylated state (migrating to the forefront of the Phos-Tag gel;  
246 Fig. 4f).

247 **C-terminal phosphorylation of Grin2A modulates NMDAR-mediated current kinetics**

248 To investigate the functional significance of hypo-phosphorylation of Grin2A on NMDAR-  
249 mediated currents, we focused on the down-regulated phosphorylation sites of Grin2A identified  
250 from the phosphoproteome data. Specifically, the phosphorylation of Grin2A S1384 (Uniprot ID:  
251 P35436) was significantly decreased with Ng KD. In a separate sample set, the hypo-  
252 phosphorylation of Grin2A at S1384 was independently validated, and three additional sites  
253 S1198, S1201, S1204 also showed significant hypo-phosphorylation, implying the tolerance at  
254 certain phosphorylation sites. Given the profound hypo-phosphorylation pattern of Grin2A  
255 observed with a Phos-Tag gel, we generated Grin2A mutants in which the four phosphorylation  
256 sites were mutated to alanine (SA; phospho-deficient), or aspartic acid (SD; phospho-mimetic)  
257 residues to determine the role of the four serine residues in regulating NMDAR functions (Fig.  
258 5a). Given that all four phosphorylation sites are positioned in the C-terminus, a C-terminal  
259 truncated mutant (-Ct) was also created as an additional control for C-terminus-mediated  
260 functions (Fig. 5a). The Grin2A mutants were co-expressed with GFP-fused Grin1 subunit  
261 separated by a self-cleaving P2A peptide in single-copy, isogenic, inducible HEK 293 cells (Fig.  
262 5a, b). Stable cell lines were induced with doxycycline (Dox), and the expression of constructs  
263 was validated by qPCR, western blot, and live cell confocal microscopy (Fig. 5c; see also  
264 Supplementary Fig. 2a, b). Their responses to glutamate pulse were evaluated using high-  
265 throughput single-cell planar patch clamp with the SyncroPatch 384PE (Fig. 5d, left)<sup>84</sup>. Robust  
266 inward currents were elicited upon application of 10  $\mu$ M glutamate in the presence of 30  $\mu$ M  
267 glycine (Fig. 5d, right).

268 Given that the C-terminal region of the Grin subunits regulates the NMDAR channel  
269 kinetics<sup>85-87</sup> and a change in the phosphorylation state of Grin2A subunits influences the kinetics  
270 of synaptic NMDAR currents<sup>88-91</sup>, we hypothesized that the four serine sites in the C-terminus in  
271 Grin2A regulates NMDAR current kinetics, and compared the decay of NMDAR current from  
272 WT and mutants expressed in HEK 293 cells. SA and SD mutants exhibited significantly faster



273 decay of NMDAR-mediated currents compared to WT and the –Ct mutant (Fig. 5e-i). The decay  
274 kinetics was not correlated with the amplitude of peak currents in all four mutants  
275 (Supplementary Fig. 2c, d), indicating that the difference among the mutants is not due to the  
276 amount of  $\text{Ca}^{2+}$  influx. This is further supported by the recording in the  $\text{Ba}^{2+}$  containing solution,  
277 in which the SA and SD mutants also exhibited significantly faster decay compared to WT and  
278 the –Ct mutant, regardless of the size of the peak currents (Supplementary Fig. 2e-j). Given that  
279 a significant amount of Grin2A subunit existed in the hypo-phosphorylated state in the Ng KD  
280 condition, it is likely that both SA and the SD mutants mimic the dephosphorylated state of  
281 Grin2A at these phosphorylation sites, which has been shown with other proteins<sup>92-95</sup>.

282 We also found that the rise kinetics of NMDAR-mediated currents was accelerated in –  
283 Ct, SA, and SD mutants compared to WT when recorded in the presence of  $\text{Ca}^{2+}$ , and the rise  
284 kinetics was not correlated with the size of the peak current (Supplementary Fig. 3a-f). However,  
285 the difference in rise kinetics was absent in the  $\text{Ba}^{2+}$  recording condition (Supplementary Fig.  
286 3g-k), suggesting that a  $\text{Ca}^{2+}$ -dependent process also regulates channel activation via the  
287 phosphorylation of the Grin2A C-terminus.

288 Together, these data suggest that the phosphorylation state of Grin2A C-terminus  
289 regulates the kinetics of NMDAR currents, and the dephosphorylation of the four serine sites  
290 (S1198, 1201, 1204 and 1384) accelerates the current decay.

### 291 **Decreased Ng levels accelerates the decay of synaptic NMDAR currents by elevating** 292 **PP2B activity.**

293 Given that the induction of STDP-LTP requires  $\text{Ca}^{2+}$  influx through NMDARs<sup>96</sup>, that  
294 phosphorylation of the Grin2A subunit was significantly decreased with Ng KD (Fig. 4), and that  
295 the Grin2A SA and SD mutants exhibited accelerated decay of NMDAR current (Fig. 5), we  
296 examined whether the kinetics of synaptically evoked NMDAR current is altered by reduced Ng  
297 levels in the hippocampus as a potential cause for the STDP-LTP deficit seen in the Ng KD

298 condition (Fig. 3). The NMDAR-mediated currents recorded at SC-CA1 synapses were best  
299 fitted with a two-component exponential function<sup>97</sup>. While the slow component was not  
300 significantly different between the non-infected neurons and the neurons infected with Ng KD  
301 (data not shown), the fast component had a smaller decay time constant in Ng KD (Fig. 6a). The  
302 accelerated decay of synaptically evoked NMDAR-mediated currents observed in Ng KD is  
303 consistent with the case of SA and SD mutants in HEK 293 cells, suggesting that a decrease in  
304 Ng expression makes  $\text{Ca}^{2+}$  influx through NMDARs at synapses more transient by the de-  
305 phosphorylation of Grin2A.

306 With decreased Ng levels, more CaM (and thus more  $\text{Ca}^{2+}$ /CaM complex) become  
307 available for  $\text{Ca}^{2+}$  binding under a resting condition, which may lead to elevated activation of  
308  $\text{Ca}^{2+}$ /CaM-dependent phosphatase PP2B due to its high affinity toward the  $\text{Ca}^{2+}$ /CaM complex<sup>98</sup>.  
309 Therefore, we tested whether suppressing PP2B activity could rescue the accelerated decay of  
310 synaptic NMDAR-mediated currents using FK506, a PP2B antagonist. The application of FK506  
311 had no effect on the decay kinetics of NMDAR currents in the control neurons, but it rescued the  
312 accelerated decay in Ng KD to the control level (Fig. 6a). These results suggest that the basal  
313 synaptic PP2B activity in control neurons, if any, does not affect the kinetics of NMDAR currents.  
314 In Ng KD, however, decreased Ng levels increase synaptic PP2B activity, which in turn  
315 dephosphorylates the Grin2A subunit at synapses and accelerates the decay of NMDAR-  
316 mediated currents<sup>88, 89</sup>.

317 PP2B plays an important role in regulating synaptic plasticity and memory formation<sup>42, 99</sup>,  
318 <sup>100</sup>, and the elevated PP2B activity could be responsible for the impaired LTP in Ng KD. To test  
319 this idea, the effect of FK506 treatment on the STDP-LTP was examined with a pairing protocol  
320 of a 10-ms interval. Notably, FK506 rescued LTP in Ng KD (Fig. 6c-e) without affecting the  
321 magnitude of LTP in the control cells (Fig. 6b, d, e). Taken together, these results suggest that a  
322 decrease in Ng expression elevates PP2B activity, which dephosphorylates synaptic Grin2A

323 subunits and accelerates the decay of synaptic NMDAR currents, thereby leading to the  
324 impairment of LTP.

325 **Ng overexpression and decreased PP2B activity converge on the facilitation of STDP-**  
326 **LTP.**

327         Given the role of Ng in regulating the availability of CaM, and the effect of Ng KD on  
328 phosphoproteome and synaptic PP2B activity, we examined whether the facilitation of LTP by  
329 Ng OE also involves the modulation of PP2B activity. As opposed to the case of Ng KD in which  
330 more CaM become available to boost basal PP2B activity, Ng OE is expected to suppress the  
331 formation of Ca<sup>2+</sup>/CaM complexes by sequestering more CaM and thus inhibit basal PP2B  
332 activity. If decreased PP2B activity caused by Ng OE plays a crucial role in the facilitation of  
333 STDP-LTP, then blocking PP2B activity is likely to mimic the facilitative effect on STDP-LTP.  
334 Interestingly, bath application of FK506 enabled control cells to express robust STDP-LTP with  
335 the 20-ms pairing protocol which used to be a sub-threshold protocol in control cells (Fig. 7a, b,  
336 e-g), suggesting that basal PP2B activity inhibits control cells from expressing LTP under the  
337 20-ms pairing protocol.

338         If Ng OE facilitates the expression of STDP-LTP by inhibiting basal PP2B activity, then  
339 FK506 treatment is expected to occlude the facilitative effect of Ng OE on STDP-LTP. We  
340 tested this hypothesis by comparing STDP-LTP in Ng OE with and without FK506 treatment.  
341 Indeed, the magnitudes of LTP induced by the 20-ms pairing protocol in Ng OE were  
342 comparable in the presence (Fig. 7d, f, g) or the absence of FK506 (Fig. 7c, e, g). These results  
343 show that both FK506 and Ng OE broaden the temporal window of association for STDP-LTP,  
344 and Ng OE facilitates STDP-LTP by suppressing PP2B activity. However, given that FK506 did  
345 not alter the decay kinetics of synaptically evoked NMDAR currents in control cells (Fig. 6a), the  
346 facilitative effect of Ng OE or FK506 on STDP-LTP may not result from the changes in synaptic  
347 NMDAR currents, but from the suppression of PP2B activity on other targets.

348 Taken together, our results show that Ng controls the induction of spike-timing-  
349 dependent LTP at SC-CA1 synapses in the hippocampus, and that decreased Ng levels induce  
350 a significant shift in the phosphoproteome signature, enriched by various ASD and  
351 schizophrenia targets as well as PSD components. Among the significant targets, we found that  
352 hypo-phosphorylation of the NMDAR subunit Grin2A in the C-terminus caused the accelerated  
353 decay of NMDAR-mediated currents, highlighting a mechanism for Ng-dependent modulation of  
354 synaptic plasticity by regulating PP2B activity.

### 355 Discussion

356 Translating incoming  $\text{Ca}^{2+}$  signal into long-lasting changes in excitatory synaptic strength  
357 through  $\text{Ca}^{2+}$ /CaM-dependent signaling cascade is essential for information encoding in the  
358 brain. Here we show that the levels of Ng, a CaM-binding protein expressed in the postsynaptic  
359 compartment of excitatory neurons, control the efficacy of this process through regulating PP2B  
360 activity (Supplementary Fig. 4).

361 In CA1 neurons, the concentrations of Ng and CaM are estimated to be around 20  $\mu\text{M}$   
362 and 10  $\mu\text{M}$ , respectively<sup>49</sup>. Given the tight binding affinity between Ng and CaM<sup>101</sup>, it has been  
363 proposed that a majority of CaM is captured by Ng in the postsynaptic compartment in resting  
364 neurons<sup>49</sup>. Therefore, endogenous Ng in control cells strictly limits the availability of CaM and its  
365 access to  $\text{Ca}^{2+}$ . However, when Ng levels are decreased, more CaM are released from Ng and  
366 thus become available for  $\text{Ca}^{2+}$  binding<sup>102, 103</sup>. Spontaneous neuronal activity causes a  
367 fluctuation in the intracellular  $\text{Ca}^{2+}$  levels within the dendritic spines<sup>104</sup>, and decreased Ng levels  
368 in Ng KD promote the formation of a small amount of  $\text{Ca}^{2+}$ /CaM complex. PP2B is preferentially  
369 activated over CaMKII when the amount of  $\text{Ca}^{2+}$ /CaM complex is limited because  $\text{Ca}^{2+}$ /CaM  
370 complex has a much higher affinity for PP2B compared to CaMKII<sup>45, 98</sup>. Therefore, Ng KD is  
371 likely to enhance basal activity of PP2B, causing the accelerated decay of NMDAR-mediated  
372 current by dephosphorylation as well as the impairment of LTP (Supplementary Fig. 4a).

373           On the other hand, increasing Ng levels interfere with the formation of the Ca<sup>2+</sup>/CaM  
374 complex by capturing CaM, thus suppressing PP2B activity (Supplementary Fig. 4b). Blockade  
375 of PP2B activity by FK506 mimicked and occluded the facilitative effect of Ng OE on STDP-LTP,  
376 indicating that FK506 and Ng OE promote LTP through the same biochemical pathway. It is  
377 noteworthy that Ng OE did not influence the decay kinetics of synaptic NMDAR-mediated  
378 currents (data not shown), similarly to the lack of effect on synaptic NMDAR-mediated currents  
379 by FK506 in control cells (Fig. 6a), which implies the lack of noticeable PP2B activity at  
380 synapses. Therefore, the facilitative effect of Ng OE or FK506 on STDP-LTP presumably  
381 depends on the inhibition of PP2B activity at peri- or extra-synaptic sites. Interestingly, previous  
382 studies demonstrated that Ng is localized at a higher concentration in the dendritic spines<sup>29, 105</sup>,  
383 and thus the basal PP2B activity is likely to be higher at peri- or extra-synaptic sites compared  
384 to the dendritic spines. Importantly, the activation of CaMKII also depends on the formation of  
385 Ca<sup>2+</sup>/CaM complexes, but Ng levels may influence the activation of CaMKII to a much lesser  
386 degree compared to the case of PP2B. For activation of CaMKII, a much larger amount of Ca<sup>2+</sup>  
387 influx is required due to the weaker binding affinity of Ca<sup>2+</sup>/CaM toward CaMKII. Considering the  
388 fact that Ng dissociates from CaM in the presence of high amount of Ca<sup>2+</sup> (Fig. 2e), when Ca<sup>2+</sup>  
389 influx is large enough to sufficiently activate CaMKII, a majority of CaM becomes available for  
390 Ca<sup>2+</sup> binding regardless of Ng levels.

391           Our proteomic analyses revealed that Ng KD has profound effect on the  
392 phosphoproteome landscape, highlighting a significant bias towards postsynaptic density  
393 components. In particular, a decrease in Ng levels leads to changes in phosphorylation patterns  
394 of selective ion channels and neurotransmitter receptors, including Grin2A. This finding is  
395 consistent with our functional analysis, showing that NMDAR-mediated currents were more  
396 transient with Ng KD, which can be rescued by blocking PP2B activity, and that Grin2A mutants  
397 disrupting the four phosphorylation sites identified in the phosphoproteome study with Ng KD

398 exhibited fast current decay kinetics compared to the WT. Our data, therefore, provides a  
399 mechanistic insight into why decreasing Ng levels in neurons leads to a deficit in STDP-LTP.  
400 Heightened postsynaptic PP2B activity dephosphorylates NMDAR subunit Grin2A, thereby  
401 accelerates the decay of the NMDAR-mediated synaptic currents, and contributes to the deficit  
402 in LTP caused by Ng KD. Interestingly, Ng KD also leads to significant hyper-phosphorylation of  
403 certain targets, suggesting that the effect of Ng KD on the phosphoproteome landscape is not a  
404 generic consequence of overall increase in phosphatase activities. The functional consequence  
405 of the changes in the phosphoproteome beyond LTP will need further exploration.

406 Previous studies have shown that a change in the phosphorylation status of Grin2A  
407 subunits influences the kinetics of synaptic NMDAR currents<sup>88-90</sup>, in addition to other regulatory  
408 mechanisms, such as NMDAR Grin2 subunit composition<sup>106-109</sup> and NMDAR Grin1 (also known  
409 as NR1, GluN1) subunit interaction with CaM<sup>85, 86</sup>. However, little is known about the discrete  
410 phosphorylation sites in regulating NMDAR properties. Here we demonstrate that Grin2A C-  
411 terminal serine residues whose phosphorylation was regulated by Ng levels have a significant  
412 impact on the NMDAR current kinetics. Previous work has demonstrated an important role for  
413 the C-terminus of Grin2 in regulating NMDAR gating properties<sup>110</sup>. Furthermore, a change in the  
414 phosphorylation status of Grin2A subunits influences the kinetics of synaptic NMDAR currents<sup>89,</sup>  
415 <sup>90</sup>. However, aside from the demonstration of a few putative phosphorylation sites in the  
416 proximal C-terminal region of Grin2A involved in regulating NMDAR channel kinetics<sup>88</sup>,  
417 identification and functional characterization of C-terminal phosphorylation sites has been  
418 lacking. Using quantitative phosphoproteomic approach, we identified phosphorylation sites in  
419 the C-terminus of Grin2A. With the high-throughput patch clamping technique, we were able to  
420 resolve the roles of C-terminal phosphorylation on NMDAR current kinetics. The similar effect of  
421 the SA and SD mutants on NMDAR channel properties suggest that the C-terminal region is  
422 stringently regulated by the phosphorylation state to achieve the modulation of channel

423 properties. Given that there is no crystal structure yet available for NMDARs that includes the C-  
424 terminus of Grin2A, it is difficult to postulate how phosphorylation at the distal end of the C-  
425 terminus impacts the charge distribution and gating. Although many questions still remain, our  
426 work clearly demonstrates significant regulatory functions of distal C-terminal phosphorylation of  
427 Grin2A subunit on the channel properties of NMDARs.

428 Taken together, our studies show that Ng levels in the postsynaptic compartment of  
429 excitatory synapses dictate the induction of LTP by regulating PP2B activity. We identified one  
430 important target, the NMDAR subunit Grin2A downstream from PP2B in the Ng KD condition,  
431 contributing to shifts in STDP-LTP caused by changes in Ng levels. The facilitative role of Ng  
432 OE in inducing LTP suggests that the rapid increase in Ng translation following neuronal activity  
433 will promote the expression of LTP in the population of neurons receiving a similar pattern of  
434 excitatory input repeatedly, thus serving as a positive-feedback regulator for LTP and potentially  
435 improving the fidelity of memory encoding.

436 Ng expression is dynamically regulated in neurons at both translational and transcription  
437 levels under different behavioral and hormonal states<sup>21, 29, 111-113</sup>. Therefore, the regulation of  
438 Ca<sup>2+</sup>-dependent signaling cascade by Ng levels provides a mechanism how the behavioral  
439 states of the animals control the efficacy of the information encoding in the brain. Moreover,  
440 given the association of Ng with schizophrenia, Jacobsen syndrome and Alzheimer's Disease<sup>7,  
441 23-25, 114</sup>, and the profound impact of Ng KD on ASD- and schizophrenia-associated gene targets  
442 (Fig. 4), our results highlight that the components in the Ca<sup>2+</sup>/CaM-dependent signaling cascade,  
443 in particular PP2B and Grin2A, are potential therapeutic targets for cognitive impairment in  
444 these diseases.

445



446 **Methods**

447 **Animals.** 7-9 weeks old male C57BL/6 mice (Charles River, USA) were used in  
448 electrophysiology experiments. All mice were housed in a pathogen-free, temperature- and  
449 humidity-controlled vivarium on a 12-hour light-dark cycle at the Small Animal Facility at the  
450 Massachusetts Institute of Technology, and were given ad libitum access to food and water. All  
451 procedures related to animal and treatment conformed to the policies of the Committee on  
452 Animal Care (CAC) of the Massachusetts Institute of Technology.

453 **Primary Neuron Cultures.** Dissociated cortical neuron culture was prepared from newborn  
454 pups of C57BL/6 mice. After dissecting out the cortical areas, the tissues were mildly digested  
455 with papain for 20 minutes at 37°C and dissociated with gentle trituration. Following the  
456 digestion, cells were plated on poly-D-lysine-coated 12-well plates containing neurobasal media  
457 (Invitrogen) supplemented with B27 (Invitrogen). 5-fluoro-2-deoxyuridine was added in culture  
458 media at DIV4 to inhibit the growth of glial cells. Neurons were infected with respective  
459 lentiviruses at DIV7 and collected at DIV17 for analysis with immunoblot.

460 **Cell Lines.** Constructs for expressing NMDAR subunits were co-transfected with FLP  
461 recombinase (pOG44; Thermo) into FlpIn TREx 293 cells (Thermo) and selected for hygromycin  
462 resistance (200 µg/mL) to select for and expand small polyclonal pools of single-copy isogenic  
463 cell lines. Cells were cultured in customized NEAA-free DMEM/F12 media (Thermo) with 10%  
464 FBS, selection antibiotics (200 µg/mL hygromycin and 15 µg/mL blasticidin), and NMDAR  
465 inhibitors (1 µg/mL AP5, DCKA, and MK801). For induction,  $\sim 1 \times 10^6$  cells were plated in the  
466 absence of selection antibiotics in a 10-cm dish for 3 days and induced with 1 µg/mL  
467 doxycycline hyclate (Sigma) for 48 hours in the presence of NMDAR inhibitors and grown to  
468 near confluency to improve consistency and reduce variability in recordings (data not shown).  
469 Cells were harvested with Accutase (Sigma), suspended in a 1:1 mix of serum free media and



470 pECS-DCF at a concentration of ~500k/mL, held in a teflon reservoir chilled to 10C, and  
471 recorded as soon as possible.

472 **Cloning of Lentiviral Constructs and Lentivirus Production.** The lentiviral transfer vector  
473 FUGW and its variant FHUGW were used to create all lentiviral constructs used in this study.  
474 The variant FHUGW contains an H1 promoter that drives the expression of an RNAi cassette. In  
475 the knockdown experiment, the shRNA targeting Ng mRNA is expressed under the H1  
476 promoter, and eGFP was expressed simultaneously to label infected cells. In studies with Ng  
477 overexpression, Ng (Ng-eGFP) or a Ng mutant lacking the CaM-binding IQ motif (Ng $\Delta$ IQ-eGFP)  
478 fusion protein was expressed under the ubiquitin promoter.

479 For the production of these lentiviruses, HEK cells were co-transfected with the lentivirus  
480 transfer vectors above, along with the human immunodeficiency virus packing vectors  
481 pRSV/REV and pMDLg/pRRE, and the envelope glycoprotein vector VSV-G using FUGENE6  
482 transfection reagent (Roche, Basel, Switzerland). Supernatants of culture media were collected  
483 about 60 hours after transfection, and the lentiviral particles were concentrated by centrifuging  
484 at 50,000x g. To infect hippocampal CA1 neurons *in vivo*, the concentrated lentiviral particles  
485 were infected into the CA1 area of hippocampus bilaterally via stereotaxic surgery. To infect  
486 dissociated cortical neuron cultures, 5  $\mu$ L of concentrated lentivirus was applied into 1 mL of  
487 culture media for each well in a 12-well plate.

488 **Cloning of NMDAR Subunits.** Rat Grin1 (NM\_017010.2) was cloned downstream of its 31  
489 amino acid signal peptide and EGFP in frame with a P2A peptide fused to rat Grin2A  
490 (NM\_012573.3). This cassette was then cloned into a modified pFRT-TO single-copy inducible  
491 vector (Thermo). Mutations were generated in Grin2A via PCR mutagenesis and subcloned  
492 back into the expression construct.

493 **Validation of Gene Expression by qPCR.**  $\sim 1 \times 10^6$  cells were collected 48 hours after  
494 doxycycline induction, and total RNA was collected using the RNeasy Plus kit (Qiagen). 1  $\mu$ g

495 of total RNA was used to generate random hexamer-primed cDNA using the Transcriptor cDNA  
496 synthesis kit (Roche). qPCR was done using SYBR Green (Roche) and custom-designed  
497 primers, and data was analyzed using the ddCt method, plotting fold change relative to non-  
498 induced controls normalized to ACTB. rGrin1-qPCR-F: gtcacatcctttctgcaagc; rGrin1-qPCR-R:  
499 ccagagatctcgcggtcc; rGrin2A-qPCR-F: caaggccagctgctatgg; rGrin2A-qPCR-R:  
500 tgccatccaagtcacatt; ACTB-qPCR-F: CCAACCGCGAGAAGATGA; ACTB-qPCR-R:  
501 CCAGAGGCGTACAGGGATAG.

502 **Immunoblot Analysis.** For lentivirus characterization, cortical neuron culture infected with  
503 lentivirus was lysed in the Laemmli sample buffer (Bio-Rad) supplemented with 2-  
504 mercaptoethanol, PhosSTOP phosphatase inhibitor cocktail (Roche Diagnostics), and the  
505 complete mini EDTA-free protease inhibitor (Roche Diagnostics). After boiling at 95°C for 10  
506 minutes, the protein samples were separated on a 10% SDS-PAGE gel. After transferring at  
507 4°C, the membrane (PVDF, Immobilon-FL) was blocked in 5% milk, 0.2% Tween 20, PBS, and  
508 incubated with anti-Ng antibody (Millipore, AB5620 or 07-425, 1:1000) and anti-Actin antibody  
509 (Sigma, A2228, 1:3000) for one hour at room temperature. The membrane was washed in 5%  
510 milk, 0.2% Tween 20, and PBS four times for 10 minutes each. The membrane was then  
511 subsequently incubated with the secondary antibodies goat anti-mouse 680 (Licor) or goat anti-  
512 rabbit 800 (Licor) conjugated with IR dyes at room temperature for one hour. After washing the  
513 membrane, bands were visualized with the Licor Odyssey imaging system.

514 For the characterization of NMDAR subunits,  $\sim 1 \times 10^6$  cells were collected 48 hours after  
515 doxycycline induction and total protein lysate was collected from frozen pellets in lysis buffer (in  
516 mM; 1 sodium orthovanadate, 20 sodium phosphate, 5 EDTA, 5 EGTA, 100 sodium chloride, 10  
517 sodium pyrophosphate, 50 sodium fluoride, 1% Triton X100) rocked at 4°C for 1 hour before  
518 preclearing. 25  $\mu$ g of non-boiled protein lysate was run under denaturing conditions on NuPage  
519 3-8% TA precast gels (Thermo), transferred to nitrocellulose membranes (TransBlot, HMW

520 protocol; BioRad), and blotted overnight with primary antibodies against Grin1 (abcam  
521 ab109182; 1:1000 in 5% milk), Grin2A (C-term: Millipore 05-901R; N-term: GeneTex  
522 GTX103558; 1:1000 in 5% milk), and ACTB (Sigma A5441; 1:50000 in 5% BSA). Western blots  
523 were visualized using femto ECL detection (Pierce) with HRP-conjugated secondary antibodies  
524 (NA931V 1:10,000, NA9340V 1:2500 (GE)) and documented with a ChemiDoc (BioRad) using  
525 exposure times under 10 seconds.

526 **Phos-Tag SDS-PAGE Analysis.** A separating gel with 5% acrylamide was prepared using Tris-  
527 HCl solution (pH 8.8) with 25  $\mu$ M Phos-Tag acrylamide and 50  $\mu$ M  $MnCl_2$ . The gel was further  
528 strengthened by adding 0.6% agarose before the gel polymerization started. A stacking gel with  
529 4% acrylamide was prepared using Tris-HCl solution (pH 6.8) and was strengthened by adding  
530 0.3% agarose. Following the completion of gel running in the Tris-glycine buffer, the gel was  
531 soaked in the transfer buffer containing 5 mM EDTA three times for 10 minutes each to remove  
532  $Mn^{2+}$  ions from the gel, then washed in a regular transfer buffer without EDTA for 10 minutes.  
533 The proteins were transferred to the PVDF membrane (Immobilon-P<sup>SQ</sup>), and after the transfer,  
534 the membrane was blocked in 5% BSA, 0.1% Tween 20, and TBS. The membrane was then  
535 incubated in a primary antibody, anti-Grin2A (Millipore, 07-632, 1:500), in 5% BSA, 0.1% Tween  
536 20, and TBS overnight at 4°C, then washed in 5% BSA, 0.1% Tween 20, and TBS four times for  
537 10 minutes each. The membrane was subsequently incubated with a secondary antibody goat  
538 anti-rabbit 800 (Licor) conjugated with IR dyes at room temperature for one hour. After washing  
539 the membrane, bands were visualized with the Licor Odyssey imaging system.

540 **Pull-down of Ng using CaM Beads.** HEK cells were transiently transfected with a plasmid  
541 expressing either wildtype Ng (Ng WT) or a mutant form of Ng lacking CaM-binding IQ motif  
542 (Ng $\Delta$ IQ) using lipofectamine 2000. Following 20 hours of expression, the cells were cooled  
543 down on ice and quickly washed with ice cold PBS. The cells were scraped into cold PBS and  
544 pelleted at 3000x g for five minutes at 4°C. After removing the supernatant, the cell pellet was

545 re-suspended and lysed in cold lysis buffer containing 150 mM NaCl, 20 mM Tris (pH 7.5), 1  
546 mM DTT, complete mini EDTA-free protease inhibitor (Roche Diagnostics), 1% Triton X-100  
547 and either 2 mM EGTA or 2 mM Ca<sup>2+</sup>. After spinning down the lysed samples at 10000x g for 10  
548 minutes at 4°C, insoluble precipitates were removed and 10% of the supernatant was saved as  
549 an input. The remaining 90% of the supernatant was added to the pre-washed CaM beads  
550 (Calmodulin Sepharose 4B, GE Healthcare, 17-0529-01) and incubated overnight with gentle  
551 rotation. The CaM beads were pelleted at 2000x g for one minute, and the supernatant was  
552 saved as a flow-through portion. The beads were then washed with a lysis buffer three times for  
553 10 minutes each at room temperature, and the bound proteins were eluted from the beads by  
554 boiling in 1% SDS for 10 minutes. The amount of Ng in input, flow-through, and CaM bead pull-  
555 down fractions were examined using immunoblot analysis.

556 **Live Cell Imaging.** Cells were plated on glass bottom 35-mm tissue culture dishes (MatTek)  
557 and induced for 2 days with doxycycline. Cells were maintained in a stage top incubator  
558 (okolabs) at 37°C and 5% CO<sub>2</sub> and imaged with a CSU-X1 spinning disc confocal (Andor) using  
559 a Ti-Eclipse microscope and a 60x oil objective (Nikon).

560 **Stereotaxic Surgery and Preparation of Acute Slice.** Stereotaxic surgery was used to inject  
561 concentrated lentivirus particles into the CA1 region of the hippocampus in C57BL/6 mice. In  
562 this procedure, 7-week-old mice were anesthetized with a ketamine/xylazine cocktail by  
563 intraperitoneal injection. After confirming anesthesia, lentivirus particles were injected into the  
564 hippocampus based on the antero-posterior and lateral coordinates assigned to the CA1 region.  
565 Following the injection, animals were returned to their cages and allowed to recover.

566 **Electrophysiology.** All experiments were performed 5-9 days after stereotaxic injection of  
567 lentiviral particles. Acute hippocampal slices (300-µm thick) were prepared based on a  
568 published protocol<sup>115</sup>.

569 STDP experiments were carried out under current-clamp configuration at 30°C in  
570 artificial cerebrospinal fluid (ACSF) containing 119 mM NaCl, 2.5 mM KCl, 1 mM NaH<sub>2</sub>PO<sub>4</sub>, 26  
571 mM NaHCO<sub>3</sub>, 11 mM D-glucose, 2.5 mM CaCl<sub>2</sub>, 1.3 mM MgCl<sub>2</sub>, and 100 μM picrotoxin. ACSF  
572 was saturated with 95% O<sub>2</sub> and 5% CO<sub>2</sub>. The patch pipette (4.5-7 MΩ) solution contained 130  
573 mM K-gluconate, 10 mM KCl, 10 mM HEPES, 0.2 mM EGTA, 4 mM MgATP, 0.5 mM NaGTP,  
574 and 10 mM sodium phosphocreatine.

575 The Schaeffer collaterals were stimulated at 0.1 Hz to evoke baseline excitatory  
576 postsynaptic potentials (EPSPs) of 3-8 mV. STDP was induced by 100 pairings of presynaptic  
577 and postsynaptic stimulations at 5 Hz. Each pairing was consisted of stimulation at Schaeffer  
578 collaterals followed by four action potentials given at 100 Hz at various positive time intervals.  
579 Each action potential was evoked by injecting a brief depolarizing current pulse (3 ms, 1-2 nA)  
580 through the patch pipette. Induction of LTP was monitored over 30 min following the pairing  
581 stimulation. All recording data were collected using acute slices prepared from lentivirus-injected  
582 animals, either uninfected neurons as a control or infected neurons. Small, hyperpolarizing  
583 voltage steps were given at the beginning and end of each recording to monitor input and series  
584 resistances under the voltage clamp configuration. In the case of all current clamp experiments,  
585 small hyperpolarizing current steps were given for on-line monitoring of input resistance. The  
586 cells in which input resistance changed by more than 30% throughout the recording were  
587 discarded.

588 Potential changes in presynaptic release probability were accessed by measuring the  
589 PPR. PPR recording was performed under voltage clamp configuration, and targeted neurons  
590 were recorded at a holding potential of -70 mV. Excitatory postsynaptic currents (EPSCs) were  
591 recorded in response to Schaeffer collateral stimulation. Two consecutive EPSCs were evoked  
592 using paired-pulse stimulation with a 50-ms interval, and the recording was repeated 30 times at  
593 0.1 Hz. To measure AMPAR/NMDAR ratio, CA1 neurons were patched under voltage clamp

594 configuration and initially held at -70 mV for 5-10 min to ensure the stability of EPSCs. The cells  
595 were subsequently depolarized to +40 mV and EPSCs (mediated by both AMPAR and NMDAR)  
596 were monitored for 5-10 min at 0.1 Hz. At that point, D-APV (100  $\mu$ M) was applied for 10-20 min  
597 to isolate AMPAR-mediated EPSCs. A dual component EPSC was obtained by averaging 10-20  
598 consecutive responses immediately before application of D-APV. An average AMPAR EPSC  
599 was obtained by averaging 10-20 consecutive responses beginning 7 min after the application  
600 of D-APV. An NMDAR EPSC was calculated by subtracting an average AMPAR EPSC from the  
601 dual component EPSC. To study NMDAR-mediated current kinetics, EPSCs were recorded in  
602 CA1 neurons in a voltage-clamp mode with a -70 mV holding potential.  $Mg^{2+}$  was removed from  
603 ACSF to unblock NMDAR, and 20  $\mu$ M CNQX was added in the ACSF to block AMPAR-  
604 mediated currents. The decay of NMDAR current was analyzed by fitting the currents to two  
605 exponential functions using OriginPro (OriginLab).

606 In experiments to measure PPR, AMPAR/NMDAR ratio and NMDAR-mediated currents,  
607 the patch pipette solution (4.5-7 M $\Omega$ ) contained 115 mM CsMeSO<sub>3</sub>, 2.8 mM NaCl, 20 mM  
608 HEPES, 0.4 mM EGTA, 4 mM MgATP, 0.5 mM NaGTP, 10 mM sodium phosphocreatine, 5 mM  
609 TEA-Cl, and 5 mM QX-314. All data were collected using a MultiClamp 700B amplifier (Axon  
610 Instruments) digitized at 20 kHz with the analog-to-digital converter ITC-18 computer interface  
611 (Heka Instruments). Data were acquired with Igor Pro software (Wavemetrics).

612 **High-throughput Planar Patch Clamp.** All recordings were performed using the SyncroPatch  
613 384PE system (Nanion). External solution was (in mM) 10 HEPES, 80 NaCl, 60 NMDG, 4 KCl,  
614 6 CaCl<sub>2</sub>, 8 glucose, pH 7.4, 290 mOsm and was supplemented with 30  $\mu$ M glycine to limit the  
615 effects of glycine-dependent desensitization on recordings. Internal solution was (in mM) 20  
616 EGTA, 10 HEPES, 50 CsCl, 10 NaCl, 60 CsF pH 7.2, 285 mOsm. Divalent cation free  
617 extracellular solution (pECS DCF) was (in mM) 10 HEPES, 145 NaCl, 4 KCl, 8 glucose, pH 7.4,  
618 300 mOsm. For barium recordings, external solution was the same as above except 6 BaCl<sub>2</sub>

619 replacing 6 CaCl<sub>2</sub>, and internal solution was (in mM) 10 EGTA, 10 HEPES, 20 CsCl, 90 CsSO<sub>4</sub>  
620 pH 7.2, 285 mOsm. 10 μM glutamate (sodium salt) was added to external solution for ligand  
621 application. Cells were sealed in the whole-cell configuration, held at -60 mV, stimulated with a  
622 5 μL puff of glutamate, and buffer was exchanged 1 sec following ligand application. Recordings  
623 were acquired at 5 kHz for 12 seconds post-ligand application. For further details and  
624 consideration of SyncroPatch 384PE experimental design, see the reference by Pan et al<sup>116</sup>.

625 For data analysis, high quality traces were manually selected from DataControl and then  
626 analyzed with custom Igor scripts. Briefly, raw traces were read in as waves, Sazitzky filtered  
627 with 8 poles at 30 kHz, and trimmed to first 5 seconds of recording which were the most  
628 consistent between wells and across biological replicates. Peak currents were extracted before  
629 traces were normalized to peak current, fit with a two-exponential for decay kinetics, and  
630 averaged. The fast component of the two-exponential was reported as the decay tau, as the  
631 slow component was more variable, likely due to the incomplete removal of glutamate after  
632 ligand delivery (data not shown). Plots and statistical analysis were done in GraphPad Prism.

### 633 **Proteome and Phosphoproteome Study**

634 **Cellular lysis and enzymatic digestion** Mouse primary neuronal cultures were lysed in  
635 8 M urea with protease and phospho-protease inhibitors, and subsequently digested following a  
636 protocol described elsewhere<sup>66</sup>. A small aliquot of cellular lysate was removed from each  
637 sample for protein quantification via the Pierce BCA assay kit (Pierce, Rockford, IL). After  
638 proteolytic digestion, the samples were quenched with formic acid to a final concentration of  
639 1.0% and subsequently desalted on 30 mg OASIS HLB solid phase columns (Waters, MA,  
640 USA).

641 **Tryptic peptide labeling with TMT reagent** From each condition (n=6) 460 μg aliquots  
642 of the Ng KD dried tryptic peptides were reconstituted in 100 mM HEPES (pH 8.0) to a final  
643 concentration of 1.0 mg/mL. The peptides were labeled with Thermo Fisher TMT-6 isobaric



644 mass tag reagent according to manufacturer's instructions (Thermo Fisher). The peptides were  
645 labeled at a 1:8 ratio of peptide to TMT reagent, followed by one hour incubation at room  
646 temperature with bench top shaking at 850 rpm. After incubation, a 1.0  $\mu\text{g}$  aliquot of labeled  
647 tryptic peptide was removed from each labeled condition, desalted with C18 stage tips<sup>117</sup>, and  
648 analyzed by mass spectrometry to ensure that isobaric label incorporation  $\geq 95\%$ . An additional  
649 1.0  $\mu\text{g}$  of labeled tryptic peptide was removed from each channel, mixed together, desalted on a  
650 C18 stage tip, and analyzed via mass spectrometry to ensure equal relative protein loads.  
651 During these quality control steps the labeled peptides were stored, unquenched at  $-80^{\circ}\text{C}$ . After  
652 validation, each channel was quenched with a 5% hydroxylamine solution to a final sample  
653 concentration of 0.3% to quench any unbound isobaric tags. The corresponding 6 channels  
654 were mixed together for a total amount of 2.8 mg of labeled tryptic peptides. The labeled peptide  
655 mixture was dried down in a speedvac, reconstituted in 500  $\mu\text{l}$  of 3% acetonitrile/0.1% formic  
656 acid, and subsequently desalted on tC18 Sep-Pak columns (Waters, MA, USA) in preparation  
657 for basic reverse phase fractionation.

658       **Basic reverse phase fractionation** The dried peptides were reconstituted in 800  $\mu\text{l}$  of 5  
659 mM ammonium formate (pH 10), and were separated by basic reversed-phase chromatography  
660 on an Agilent Zorbax 300  $\text{\AA}$  4.6mm x 250mm Extend-C18 column, using an Agilent 1100 Series  
661 HPLC instrument (Agilent Technologies). Solvent A (2% acetonitrile, 5 mM ammonium formate,  
662 pH 10), and a non-linear increasing concentration of solvent B (90% acetonitrile, 5 mM  
663 ammonium formate, pH 10) was used as the mobile phase with a flow rate of 1 ml/min through  
664 the column. A non-linear gradient with increasing percentages of solvent B with 4 different  
665 slopes was used (0% for 7 min; 0% to 16% in 6 min; 16% to 40% in 60 min; 40% to 44% in 4  
666 min; 44% to 60% in 5 min; 60% for 14 min) and the eluted peptides were collected in a  
667 Whatman polypropylene 2 mL 96 well plate. A total of 96 fractionations were collected ( $\sim 1$   
668 ml/fraction) for a total run time of 96 minutes. The 96 fractions were concatenated into 25 larger



669 fractions, based on the concatenation protocol described elsewhere<sup>118</sup>. From these 25 fractions,  
670 5% of the total volume was removed and used for global proteome analysis. The remaining 95%  
671 of each of the fractions were further concatenated down to 13 fractions and phosphopeptide  
672 enrichment was performed with these fractions following the IMAC phospho-enrichment protocol  
673 described elsewhere<sup>66</sup>.

674 **Mass spectrometry analysis** Both the proteome and phosphoproteome were analyzed  
675 using a Thermo Fisher Q-Exactive Plus mass spectrometer coupled to a Thermo-Scientific  
676 EASY-nLC 1000 liquid chromatograph (Thermo Fisher Scientific). Peptides were separated at a  
677 flow rate of 200 nL/min on a self-made capillary column (Picofrit with a 10- $\mu$ m tip opening and  
678 75  $\mu$ m diameter, New Objective , PF360-75-10-N-5) packed with 20-cm of C18 1.9  $\mu$ m silica  
679 beads (1.9- $\mu$ m ReproSil-Pur C18-AQ medium, Dr. Maisch GmbH, r119.aq). Injected peptides  
680 were separated at a flow rate of 200 nL/min with a linear 84-min gradient from 100% solvent A  
681 (3% acetonitrile, 0.1% formic acid) to 30% solvent B (90% acetonitrile, 0.1% formic acid),  
682 followed by a linear 9-min gradient from 30% solvent A to 90% solvent B for a total of 110  
683 minutes. The Q-Exactive plus instrument was operated in the data-dependent mode acquiring  
684 higher-energy collisional dissociation tandem mass spectrometry (HCD MS/MS) scans  
685 (Resolution = 17,500) for TMT-6 on the 12 most abundant ions using an MS1 ion target of  $3 \times$   
686  $10^6$  ions and an MS2 target of  $5 \times 10^4$  ions. The maximum ion time used for the MS/MS scans  
687 was 120 ms; the HCD-normalized collision energy was set to 31; the dynamic exclusion time  
688 was set to 20 secs, and the peptide-match preferred setting was enabled.

689 **Quantitation and identification of peptides and proteins for both proteome and**  
690 **phosphoproteome** All mass spectra were processed using Agilent Spectrum Mill Proteomics  
691 Workbench software package pre 6.0 commercial release. For peptide identification, the MS/MS  
692 spectra were searched against the UNIPROT mouse database  
693 (<http://www.uniprot.org/uniprot/?query=proteome:UP000000589>) with frequently occurring

694 laboratory contaminants added to the list. The peptides were searched with both fixed and  
695 variable modifications. The fixed modifications included N-terminal and lysine modification with  
696 the TMT-6 isobaric mass tag and carbamidomethylation turned on. The variable modifications  
697 included were N-terminal acetylation, oxidized methionine, and the phosphorylated amino acids  
698 serine, threonine, and tyrosine to account for phosphorylation sites. Database matches for the  
699 individual spectra were auto-validated by a user-defined threshold for peptides (false discovery  
700 rate (FDR) < 1.2%) and an automatic threshold for proteins in a two-step process. In Spectrum  
701 Mill, FDRs are calculated at 3 different levels: spectrum, distinct peptide, and distinct protein.  
702 Peptide FDRs are calculated in Spectrum Mill using essentially the same pseudo-reversal  
703 strategy previously evaluated<sup>119</sup> and shown to perform the same as concatenation. A false  
704 distinct protein identification occurs when all of the relevant peptides, which group together to  
705 constitute a distinct protein, have a delta Forward Reverse Score < 0. Spectrum Mill also  
706 performs protein grouping using the methods described<sup>120</sup>. Briefly, when a peptide sequence  
707 (>8 residues long) is contained in multiple protein entries in the protein database, the proteins  
708 are grouped together, and the highest scoring peptide and its accession number are reported. In  
709 some cases, when the protein sequences are grouped in this manner, there are distinct  
710 peptides which uniquely represent a lower scoring member of the group (isoforms and family  
711 members). Each of these instances spawns a subgroup, and multiple subgroups are reported  
712 and counted towards the total number of proteins. TMT reporter ion ratios are obtained by  
713 calculating the median reporter ion ratio over all distinct peptides assigned to that protein  
714 subgroup.

715 **Data analysis** The significance of changes in the phosphorylation of individual peptides  
716 was evaluated by moderated T-test with a Benjamini-Hochberg correction using the Limma  
717 package<sup>121, 122</sup>. Changes in phosphorylation sites on proteins for which total proteome  
718 information was available were normalized to the change in total protein quantity as determined

719 by Spectrum Mill. The set of significantly and differentially phosphorylated sites was taken as  
720 the union of the sites significant after normalization and non-normalized significant sites for  
721 which total protein level quantification was not available. Overlap analysis was performed with  
722 this set of proteins against the PSD proteins identified by Bayes et al<sup>73</sup>, with significance  
723 evaluated by hypergeometric test. Pathway enrichment analysis was performed on the set of  
724 differentially phosphorylated proteins overlapping the PSD using the clusterProfiler R package<sup>76</sup>.  
725 **Statistical Analysis.** All bar graphs are presented as the means  $\pm$  standard error of the mean  
726 (SEM). The sample size and statistical methods used in each experiment is provided in the  
727 relevant figure legends. All statistical analysis was conducted using GraphPad Prism 7.02  
728 (GraphPad Software Inc.), and significance is shown as \* $p < 0.05$ , \*\* $p < 0.01$ , \*\*\* $p < 0.001$ .

#### 729 **Acknowledgements**

730 The authors would like to thank Y. Liu and X. Ren for their excellent technical support,  
731 and Drs. E. Scolnick, E. Nedivi, L.-H. Tsai, M. Bear, J. Lisman and M. Wilson for their comments.  
732 This work was supported by the Broad Institute Stanley Center Neuropsychiatry Initiative grant,  
733 the JPB foundation and the Whitehall foundation (W. X.).

#### 734 **Author contributions**

735 Conceptualization, H.H. and W.X.; Methodology, H.H., A.A.<sup>5</sup>, H.H.<sup>1</sup>, J.Q. P., S.A.R., R.A.  
736 and W.X.; Investigation, H.H, M.J.S, A.A.<sup>5</sup>, A.N.V., N.A.V., S.C.P., and S.Y.W.; Formal Analysis,  
737 H.H., L.J.D, F.G., R.A., A.A.<sup>5</sup>, A.A.<sup>6</sup>, and W.X.; Writing – Original Draft, H.H., W.X. and R.A.;  
738 Writing – Review & Editing, H.H., W.X., A.A.<sup>6</sup>, and R.A.; Funding Acquisition, W.X.; Supervision,  
739 W.X., J.P.Q., S.A.C and R.A.

#### 740 **Conflict of Interest**

741 The authors declare no competing interests.

742

743 **Figure Legends**

744 **Fig. 1 | Ng overexpression does not affect basal synaptic transmission and pairing-**  
745 **induced LTP with 10-ms interval.**

746 (a) Ng binds to CaM and regulates the amount of CaM available for Ca<sup>2+</sup> binding. Purple: Ng  
747 (only the CaM-binding IQ motif of Ng is depicted), Green: CaM, Yellow spheres: Ca<sup>2+</sup> ions (PDB:  
748 CaM, 1CFD; Ca<sup>2+</sup>/CaM complex, 3CLN; Ng-CaM complex, 4E50).

749 (b) Diagram of a lentivirus vector for Ng overexpression (Ng OE). LTR, long terminal repeat; Ψ,  
750 packing signal; Flap, flap element from HIV-1; pH1, H1 promoter; pUb, ubiquitin promoter; WRE,  
751 woodchuck hepatitis virus posttranscriptional regulatory element.

752 (c) Immunoblot of cortical neuron culture infected with the Ng OE or GFP only (control) lentivirus  
753 shows effective overexpression of exogenous Ng-GFP fusion protein or GFP, respectively.

754 (d) Experimental timeline for whole-cell patch clamp recordings is shown in the top panel.  
755 Bottom panel: The DIC and epifluorescence images show robust and exclusive expression of a  
756 lentiviral construct in the hippocampal CA1 region.

757 (e) Comparison of paired-pulse ratio at 50-ms interval recorded from control and Ng OE  
758 neurons. Upper panel: average traces from control and Ng OE cells (scale bars, 100 pA, 50 ms).  
759 Bottom panel: collective data of paired-pulse ratio in control (n=12, 1.94 ± 0.10) and Ng OE (n=7,  
760 1.89 ± 0.13) cells. The paired-pulse ratio values from individual cells are shown as small open  
761 circles. The average values are shown as filled circles with SEM (n.s.; not significant, t-test).

762 (f) Comparison of NMDAR-EPSC to AMPAR-EPSC ratio in control and Ng OE neurons. Evoked  
763 EPSCs were measured in CA1 neurons following Schaffer collateral stimulation. Left panel:  
764 superimposed representative EPSC traces of dual components (compound EPSC of AMPAR  
765 and NMDAR), NMDAR-EPSC and AMPAR-EPSC measured at +40 mV. AMPAR-EPSC was  
766 obtained by application of D-APV, and NMDAR-EPSC was calculated by subtracting AMPAR-  
767 EPSC from dual components (scale bars, 50 pA, 50 ms). Right panel: collective data of the ratio

768 of peak AMPAR-EPSC to NMDAR-EPSC in control (n=7,  $0.73 \pm 0.08$ ) and Ng OE (n=6,  $0.66 \pm$   
769  $0.06$ ) cells. AMPAR/NMDAR ratio values from individual cells are shown as small open circles.  
770 The average values are shown as filled circles with SEM (n.s.; not significant, t-test).

771 **(g)** Left panel: spike-timing-dependent plasticity was induced by 100 pairings of presynaptic and  
772 postsynaptic stimulations at 5 Hz. Each pairing consisted of stimulation at Schaeffer collaterals  
773 followed by four action potentials given at 100 Hz at various positive time intervals. An example  
774 of current clamp recording from a CA1 neuron during the pairing is shown in the right panel.

775 **(h, i)** Sample recordings of STDP at 10-ms pairing interval from an uninfected control cell and a  
776 cell infected with Ng OE. Downward arrows indicate the timing of STDP induction. Traces show  
777 averaged EPSPs indicated with 1 and 2 (scale bars, 2 mV, 50 ms).

778 **(j)** Averaged summary graphs of STDP at 10-ms interval in uninfected control (n=5) and Ng OE  
779 (n=6) cells. Each circle represents mean  $\pm$  SEM.

780 **(k)** Collective data of STDP at 10-ms interval in control (n=5,  $182.4 \pm 19.5$  %) and Ng OE (n=6,  
781  $190.6 \pm 17.8$ %) cells. EPSP after LTP induction (% baseline) values from individual cells are  
782 shown as small filled or open circles. The average values are shown as large filled or open  
783 circles with SEM (n.s.; not significant, t-test).

784 **Fig. 2 | Ng overexpression facilitates the induction of LTP with 20-ms pairing interval.**

785 **(a, b)** Sample recordings of STDP at 20-ms pairing interval from an uninfected control cell and a  
786 cell infected with Ng OE. Downward arrows indicate the timing of STDP induction. Traces show  
787 averaged EPSPs indicated with 1 and 2 (scale bars, 2 mV, 50 ms).

788 **(c)** Diagram of a lentivirus vector for a Ng mutant lacking the CaM-binding IQ motif (Ng $\Delta$ IQ).

789 **(d)** Immunoblot of cortical neuron culture infected with the Ng OE or the Ng deletion mutant  
790 lentivirus shows effective overexpression of indicated constructs. The deletion mutant runs a bit  
791 smaller compared to the wildtype Ng, as expected.

792 (e) Binding of Ng to CaM was examined by pull-down assay in the presence of 2 mM  $\text{Ca}^{2+}$  or 2  
793 mM EGTA. Immunoblot of total cell lysate (input), flow through, and proteins bound to the CaM  
794 beads (CaM bead pull-down) samples probed with an antibody against Ng C-terminal.

795 (f) A sample recording of STDP at 20-ms pairing interval from a cell infected with Ng $\Delta$ IQ. The  
796 downward arrow indicates the timing of STDP induction. Traces show averaged EPSPs  
797 indicated with 1 and 2 (scale bars, 2 mV, 50 ms).

798 (g) Averaged summary graphs of STDP at 20-ms interval in uninfected control (n=9), Ng OE  
799 (n=6) and Ng $\Delta$ IQ (n=5) cells. Each circle represents mean  $\pm$  SEM.

800 (h) Collective data of STDP at 20-ms interval in control (n=9,  $104.2 \pm 10.4\%$ ), Ng OE (n=6,  
801  $189.8 \pm 23.2\%$ ) and Ng $\Delta$ IQ (n=5,  $106.5 \pm 19.8\%$ ) cells. EPSP after LTP induction (% baseline)  
802 values from individual cells are shown as small filled or open circles. The average values are  
803 shown as large filled or open circles with SEM (\* $p < 0.05$ , One-way ANOVA and Tukey's multiple  
804 comparison test).

805 **Fig. 3 | Ng knockdown abolishes the induction of LTP at SC-CA1 synapses.**

806 (a) Diagram of a lentivirus vector for Ng knockdown (Ng KD). LTR, long terminal repeat;  $\Psi$ ,  
807 packing signal; Flap, flap element from HIV-1; pH1, H1 promoter; pUb, ubiquitin promoter; WRE,  
808 woodchuck hepatitis virus posttranscriptional regulatory element.

809 (b) Immunoblot of cortical neuron culture infected with the Ng KD or GFP only (control) lentivirus  
810 shows effective knockdown of endogenous Ng.

811 (c) Comparison of paired-pulse ratio at 50-ms interval recorded from control and Ng KD neurons.  
812 Upper panel: average traces from control and Ng KD cells (scale bars, 100 pA, 50 ms). Bottom  
813 panel: collective data of paired-pulse ratio in control (n=12,  $1.85 \pm 0.08$ ) and Ng KD (n=9,  $2.05 \pm$   
814  $0.20$ ) cells. The paired-pulse ratio values from individual cells are shown as small open circles.  
815 The average values are shown as filled circles with SEM (n.s.; not significant, t-test).

816 (d) Comparison of NMDAR-EPSC to AMPAR-EPSC ratio in control and Ng KD neurons.  
817 Evoked EPSCs were measured in CA1 neurons following Schaffer collateral stimulation. Left  
818 panel: superimposed representative EPSC traces of dual components (compound EPSC of  
819 AMPAR and NMDAR), NMDAR-EPSC and AMPAR-EPSC measured at +40 mV. AMPAR-  
820 EPSC was obtained by application of D-APV, and NMDAR-EPSC was calculated by subtracting  
821 AMPAR-EPSC from dual components (scale bars, 50 pA, 50 ms). Right panel: collective data of  
822 the ratio of peak AMPAR-EPSC to NMDAR-EPSC in control (n=6,  $0.91 \pm 0.10$ ) and Ng KD (n=6,  
823  $0.85 \pm 0.11$ ) cells. AMPAR/NMDAR ratio values from individual cells are shown as small open  
824 circles. The average values are shown as filled circles with SEM (n.s.; not significant, t-test).

825 (e, f) Sample recordings of STDP at 10-ms pairing interval from an uninfected control cell and a  
826 cell infected with Ng KD. Downward arrows indicate the timing of STDP induction. Traces show  
827 averaged EPSPs indicated with 1 and 2 (scale bars, 2 mV, 50 ms).

828 (g) Averaged summary graphs of STDP at 10-ms interval in uninfected control (n=9) and Ng KD  
829 (n=6) cells. Each circle represents mean  $\pm$  SEM.

830 (h) Collective data of STDP at 10-ms interval in control (n=9,  $196.3 \pm 15.2$  %) and Ng KD (n=6,  
831  $105.1 \pm 10.8$  %) cells. EPSP after LTP induction (% baseline) values from individual cells are  
832 shown as small filled or open circles. The average values are shown as large filled or open  
833 circles with SEM (\*\* $p < 0.01$ , t-test).

834 **Fig. 4 | Knockdown of Ng causes significant shifts in neuronal phosphoproteome.**

835 (a) Proteomic and phosphoproteomic workflow for the Ng KD experiment. Ng KD and the  
836 respective GFP controls were grown in triplicate (n=6), collected, and lysed in 8M urea with  
837 protease and phosphatase inhibitors. The denatured protein was reduced, and alkylated, and  
838 double digested with both Lys-C and Trypsin overnight. The tryptic peptides were labeled with  
839 TMT- 6 reagent and the individual label incorporation was checked via LC-MS/MS. The labeled  
840 digests were combined and basic reverse phase fractionated into 24 fractions. From each

841 fraction, 5% of the total volume was removed for proteomic analysis while the remaining 95%  
842 was used for phosphopeptide enrichment. The proteome and the phosphoproteome data was  
843 acquired on a Q-Exactive + mass spectrometer. Peptide spectrum matching and protein  
844 identification was performed using Spectrum Mill.

845 (b) Volcano plots comparing the individual phosphoproteome phosphorylation sites of the Ng  
846 KD experiment. The  $-\log_{10}$  of the adjusted  $p$  value is plotted against the average  $\log_2$  fold  
847 change for the phosphoproteome. The dotted line represents an adjusted  $p$  value of 0.05.  
848 Orange points represent identified post-synaptic density components as described by <sup>73</sup>.

849 (c) Left: The pathways highlighted with down-regulated phosphorylation of PSD targets in Ng  
850 KD. Right: The pathways highlighted with up-regulated phosphorylation of PSD targets in Ng KD.

851 (d) Left: The overlap of significantly affected phosphorylated targets by Ng KD with the ASD-  
852 associated gene set. Right: The overlap of significantly affected phosphorylated targets by Ng  
853 KD with the schizophrenia-associated gene set. The upregulated phosphoproteome with Ng KD  
854 shown in blue; the downregulated phosphoproteome with Ng KD shown in purple; the ASD  
855 gene set shown in yellow; and the schizophrenia gene set shown pink.

856 (e) The overlap of significantly affected phosphorylated targets by Ng KD with both the ASD-  
857 and schizophrenia-associated gene sets.

858 (f) A differential phosphorylation of NMDAR subunit Grin2A was examined using a Phos-Tag  
859 SDS-PAGE, and Ng KD led to an increase in the fraction of non-phosphorylated Grin2A subunit.

860 **Fig. 5 | C-terminal phosphorylation of Grin2A modulates NMDAR-mediated current**  
861 **kinetics.**

862 (a) Design of wild-type (WT), C-terminus deletion (-Ct), serine to alanine (SA), and serine to  
863 glutamate (SD) isogenic, single-copy, doxycycline-inducible NMDAR expression constructs. The  
864 four phosphorylation sites selected for mutation are S1198, S1201, S1204, and S1384 in  
865 rGrin2A (Uniprot ID: P35436).



866 (b) Experimental design for throughput analysis of NMDAR-mediated currents using a 384-well  
867 planar patch clamp electrophysiology system.

868 (c) Live cell confocal images demonstrating the surface expression of NMDAR WT and mutants  
869 48 hours post-induction with doxycycline, scale bar, 25  $\mu$ m.

870 (d) Left: Example of a 384-well (16 by 24) planar patch clamp recording. Right: Representative  
871 recordings of NMDAR-mediated currents using planar patch clamp.

872 (e) Average traces of NMDAR currents with Grin2A WT and mutant normalized to peak current  
873 highlight differences in decay kinetics in -Ct, SA and SD mutants. Shaded bands represent  
874 SEM.

875 (f) Box plots of decay Tau values of NMDAR currents recorded from the cell lines with Grin2A  
876 WT, and -Ct, SA and SD mutants. Data were compared via one-way ANOVA and significance  
877 was calculated with the Holmes-Sidak multi-comparisons test. \* $p < 0.05$ , \*\*\* $p < 0.001$ .

878 (g-i) Gaussian fits of the cumulative distribution of decay kinetics (g), probability density  
879 histograms of decay kinetics (h) and its Gaussian fits (i) demonstrate Gaussian distributions for  
880 all experimental conditions except for -Ct.

881 **Fig. 6 | Ng knockdown accelerates the decay of NMDAR-mediated synaptic currents in**  
882 **SC-CA1 synapses by increasing PP2B activity.**

883 (a) Comparison of NMDAR-mediated calcium currents recorded from control and Ng KD  
884 neurons. Left panel: average traces of NMDAR currents from control (thin line) and Ng KD (thick  
885 line) cells recorded in vehicle only (upper) or in the presence of 1  $\mu$ M FK506 (bottom). NMDAR  
886 currents were fitted with a two-exponential decay function, and the slow component were not  
887 significantly different across the four conditions. Right panel: collective data of the fast  
888 component of NMDAR currents measured from control (n = 21,  $25.70 \pm 1.44$  ms) and Ng KD (n  
889 = 15,  $18.63 \pm 0.92$  ms) cells in vehicle and from control (n = 14,  $24.31 \pm 1.34$  ms) and Ng KD (n  
890 = 10,  $25.48 \pm 1.41$  ms) cells in FK506. The fast component of exponential decay values from

891 individual cells are shown as small open circles. The average values are shown as filled circles  
892 with SEM (\*\* $p < 0.01$ , \* $p < 0.05$ , Two-way ANOVA and Tukey's multiple comparison test).

893 **(b, c)** Sample recordings of STDP at 10-ms pairing interval from an uninfected control cell and a  
894 cell infected with Ng KD in the presence of FK506. Downward arrows indicate the timing of  
895 STDP induction. Traces show averaged EPSPs indicated with 1 and 2 (scale bars, 2 mV, 50  
896 ms).

897 **(d)** Averaged summary graphs of STDP at 10-ms interval in uninfected control (n=7) and Ng KD  
898 (n=6) cells in the presence of FK506. Each circle represents mean  $\pm$  SEM.

899 **(e)** Collective data of STDP at 10-ms interval in control (n=7,  $203.6 \pm 17.8$  %) and Ng KD (n=6,  
900  $165.1 \pm 35.8$ %) cells in the presence of FK506. EPSP after LTP induction (% baseline) values  
901 from individual cells are shown as small filled or open circles. The average values are shown as  
902 large filled or open circles with SEM (n.s.; not significant, t-test).

903 **Fig. 7 | Ng overexpression facilitates LTP by suppressing PP2B activity.**

904 **(a-d)** Sample recordings of STDP at 20-ms pairing interval from an uninfected control cell in  
905 vehicle only, a control cell in the presence of FK506, a cell infected with Ng OE in vehicle only,  
906 and a cell infected with Ng OE in the presence of FK506. Downward arrows indicate the timing  
907 of STDP induction. Traces show averaged EPSPs indicated with 1 and 2 (scale bars, 2 mV, 50  
908 ms).

909 **(e)** Averaged summary graphs of STDP at 20-ms interval in uninfected control cells (n=7) and  
910 Ng OE cells in vehicle (n=6). Each circle represents mean  $\pm$  SEM.

911 **(f)** Averaged summary graphs of STDP at 20-ms interval in uninfected control cells (n=9) and  
912 Ng OE cells in FK506 (n=6). Each circle represents mean  $\pm$  SEM.

913 **(g)** Collective data of STDP at 20-ms interval in control cells in vehicle (n=7,  $105.7 \pm 13.3$ %),  
914 control cells in FK506 (n=9,  $177.1 \pm 16.3$ %), Ng OE cells in vehicle (n=6,  $215.6 \pm 24.4$ %) and  
915 Ng OE cells in FK506 (n=6,  $204.0 \pm 26.9$ %) cells. EPSP after LTP induction (% baseline) values

916 from individual cells are shown as small filled or open circles. The average values are shown as  
917 large filled or open circles with SEM (\*\* $p < 0.01$ , \* $p < 0.05$ , Two-way ANOVA and Tukey's multiple  
918 comparison test).  
919  
920

921 **References**

- 922 1. Freedman R. Schizophrenia. *N Engl J Med* 2003; **349**(18): 1738-1749.  
923
- 924 2. Lopez AD, Murray CC. The global burden of disease, 1990-2020. *Nat Med* 1998; **4**(11):  
925 1241-1243.  
926
- 927 3. Palmer BA, Pankratz VS, Bostwick JM. The lifetime risk of suicide in schizophrenia: a  
928 reexamination. *Arch Gen Psychiatry* 2005; **62**(3): 247-253.  
929
- 930 4. Sullivan PF, Kendler KS, Neale MC. Schizophrenia as a complex trait: evidence from a  
931 meta-analysis of twin studies. *Arch Gen Psychiatry* 2003; **60**(12): 1187-1192.  
932
- 933 5. Lichtenstein P, Bjork C, Hultman CM, Scolnick E, Sklar P, Sullivan PF. Recurrence risks  
934 for schizophrenia in a Swedish national cohort. *Psychol Med* 2006; **36**(10): 1417-1425.  
935
- 936 6. Schizophrenia Working Group of the Psychiatric Genomics C. Biological insights from  
937 108 schizophrenia-associated genetic loci. *Nature* 2014; **511**(7510): 421-427.  
938
- 939 7. Stefansson H, Ophoff RA, Steinberg S, Andreassen OA, Cichon S, Rujescu D *et al*.  
940 Common variants conferring risk of schizophrenia. *Nature*, vol. 4602009, pp 744-747.  
941
- 942 8. International Schizophrenia C, Purcell SM, Wray NR, Stone JL, Visscher PM,  
943 O'Donovan MC *et al*. Common polygenic variation contributes to risk of schizophrenia  
944 and bipolar disorder. *Nature* 2009; **460**(7256): 748-752.  
945
- 946 9. Ripke S, O'Dushlaine C, Chambert K, Moran JL, Kahler AK, Akterin S *et al*. Genome-  
947 wide association analysis identifies 13 new risk loci for schizophrenia. *Nat Genet* 2013;  
948 **45**(10): 1150-1159.  
949
- 950 10. Ikeda M, Aleksic B, Kinoshita Y, Okochi T, Kawashima K, Kushima I *et al*. Genome-wide  
951 association study of schizophrenia in a Japanese population. *Biol Psychiatry* 2011;  
952 **69**(5): 472-478.  
953
- 954 11. Schizophrenia Psychiatric Genome-Wide Association Study C. Genome-wide  
955 association study identifies five new schizophrenia loci. *Nat Genet* 2011; **43**(10): 969-  
956 976.  
957
- 958 12. Shi J, Levinson DF, Duan J, Sanders AR, Zheng Y, Pe'er I *et al*. Common variants on  
959 chromosome 6p22.1 are associated with schizophrenia. *Nature* 2009; **460**(7256): 753-  
960 757.  
961
- 962 13. Yue WH, Wang HF, Sun LD, Tang FL, Liu ZH, Zhang HX *et al*. Genome-wide  
963 association study identifies a susceptibility locus for schizophrenia in Han Chinese at  
964 11p11.2. *Nat Genet* 2011; **43**(12): 1228-1231.  
965
- 966 14. Rietschel M, Mattheisen M, Degenhardt F, Genetic R, Outcome in P, Muhleisen TW *et*  
967 *al*. Association between genetic variation in a region on chromosome 11 and  
968 schizophrenia in large samples from Europe. *Mol Psychiatry* 2012; **17**(9): 906-917.  
969

- 970 15. Ohi K, Hashimoto R, Yasuda Y, Fukumoto M, Yamamori H, Umeda-Yano S *et al.*  
971 Functional genetic variation at the NRG1 gene and schizophrenia: evidence from a  
972 gene-based case-control study and gene expression analysis. *Am J Med Genet B*  
973 *Neuropsychiatr Genet* 2012; **159B**(4): 405-413.  
974
- 975 16. Ohi K, Hashimoto R, Yasuda Y, Fukumoto M, Yamamori H, Umeda-Yano S *et al.*  
976 Influence of the NRG1 gene on intellectual ability in schizophrenia. *J. Hum. Genet.*, vol.  
977 582013, pp 700-705.  
978
- 979 17. Ruano D, Aulchenko YS, Macedo A, Soares MJ, Valente J, Azevedo MH *et al.*  
980 Association of the gene encoding neurogranin with schizophrenia in males. *J Psychiatr*  
981 *Res*, vol. 422008, pp 125-133.  
982
- 983 18. Pohlack ST, Nees F, Ruttorf M, Witt SH, Nieratschker V, Rietschel M *et al.* Risk variant  
984 for schizophrenia in the neurogranin gene impacts on hippocampus activation during  
985 contextual fear conditioning. *Mol. Psychiatry*, vol. 162011, pp 1072-1073.  
986
- 987 19. Thong JYJ, Qiu A, Sum MY, Kuswanto CN, Tuan TA, Donohoe G *et al.* Effects of the  
988 neurogranin variant rs12807809 on thalamocortical morphology in schizophrenia. *PLoS*  
989 *ONE*, vol. 8. Public Library of Science2013, p e85603.  
990
- 991 20. Zhou Y, Dong F, Lanz TA, Reinhart V, Li M, Liu L *et al.* Interactome analysis reveals  
992 ZNF804A, a schizophrenia risk gene, as a novel component of protein translational  
993 machinery critical for embryonic neurodevelopment. *Mol Psychiatry* 2018; **23**(4): 952-  
994 962.  
995
- 996 21. Jones KJ, Templet S, Zemoura K, Kuzniewska B, Pena FX, Hwang H *et al.* Rapid,  
997 experience-dependent translation of neurogranin enables memory encoding. *Proc Natl*  
998 *Acad Sci U S A* 2018; **115**(25): E5805-E5814.  
999
- 1000 22. Broadbelt K, Ramprasad A, Jones LB. Evidence of altered neurogranin  
1001 immunoreactivity in areas 9 and 32 of schizophrenic prefrontal cortex. *Schizophr. Res.*,  
1002 vol. 872006, pp 6-14.  
1003
- 1004 23. Chang JW, Schumacher E, Coulter PM, Vinters HV, Watson JB. Dendritic translocation  
1005 of RC3/neurogranin mRNA in normal aging, Alzheimer disease and fronto-temporal  
1006 dementia. *J. Neuropathol. Exp. Neurol.*, vol. 561997, pp 1105-1118.  
1007
- 1008 24. Thorsell A, Bjerke M, Gobom J, Brunhage E, Vanmechelen E, Andreasen N *et al.*  
1009 Neurogranin in cerebrospinal fluid as a marker of synaptic degeneration in  
1010 Alzheimer's disease. *Brain Res.*, vol. 13622010, pp 13-22.  
1011
- 1012 25. Coldren CD, Lai Z, Shragg P, Rossi E, Glidewell SC, Zuffardi O *et al.* Chromosomal  
1013 microarray mapping suggests a role for BSX and Neurogranin in neurocognitive and  
1014 behavioral defects in the 11q terminal deletion disorder (Jacobsen syndrome).  
1015 *Neurogenetics*, vol. 102009, pp 89-95.  
1016
- 1017 26. Krueger DD, Nairn AC. Expression of PKC substrate proteins, GAP-43 and neurogranin,  
1018 is downregulated by cAMP signaling and alterations in synaptic activity. *European*  
1019 *Journal of Neuroscience* 2007; **26**(11): 3043-3053.

- 1020  
1021 27. Neuner-Jehle M, Denizot JP, Mallet J. Neurogranin is locally concentrated in rat cortical  
1022 and hippocampal neurons. *Brain research* 1996; **733**(1): 149-154.  
1023  
1024 28. Ressler KJ, Paschall G, Zhou X-I, Davis M. Regulation of synaptic plasticity genes  
1025 during consolidation of fear conditioning. *The Journal of neuroscience : the official*  
1026 *journal of the Society for Neuroscience* 2002; **22**(18): 7892-7902.  
1027  
1028 29. Neuner-Jehle M, Denizot JP, Mallet J. Neurogranin is locally concentrated in rat cortical  
1029 and hippocampal neurons. *Brain Res.*, vol. 7331996, pp 149-154.  
1030  
1031 30. Represa A, Deloulme JC, Sensenbrenner M, Ben-Ari Y, Baudier J. Neurogranin:  
1032 immunocytochemical localization of a brain-specific protein kinase C substrate. *J.*  
1033 *Neurosci.*, vol. 101990, pp 3782-3792.  
1034  
1035 31. Gerendasy D. Homeostatic tuning of Ca<sup>2+</sup> signal transduction by members of the  
1036 calpacitin protein family. *J. Neurosci. Res.*, vol. 581999, pp 107-119.  
1037  
1038 32. Slemmon JR, Feng B, Erhardt JA. Small proteins that modulate calmodulin-dependent  
1039 signal transduction: effects of PEP-19, neuromodulin, and neurogranin on enzyme  
1040 activation and cellular homeostasis. *Mol. Neurobiol.*, vol. 22. Humana Press2000, pp  
1041 99-113.  
1042  
1043 33. Lisman J. A mechanism for the Hebb and the anti-Hebb processes underlying learning  
1044 and memory. *Proc Natl Acad Sci U S A* 1989; **86**(23): 9574-9578.  
1045  
1046 34. Malenka RC. Synaptic plasticity in the hippocampus: LTP and LTD. *Cell* 1994; **78**(4):  
1047 535-538.  
1048  
1049 35. Nabavi S, Fox R, Proulx CD, Lin JY, Tsien RY, Malinow R. Engineering a memory with  
1050 LTD and LTP. *Nature* 2014; **511**(7509): 348-352.  
1051  
1052 36. Whitlock JR, Heynen AJ, Shuler MG, Bear MF. Learning induces long-term potentiation  
1053 in the hippocampus. *Science* 2006; **313**(5790): 1093-1097.  
1054  
1055 37. Xia Z, Storm DR. The role of calmodulin as a signal integrator for synaptic plasticity. *Nat*  
1056 *Rev Neurosci* 2005; **6**(4): 267-276.  
1057  
1058 38. Shepherd JD, Huganir RL. The cell biology of synaptic plasticity: AMPA receptor  
1059 trafficking. *Annu Rev Cell Dev Biol* 2007; **23**: 613-643.  
1060  
1061 39. Lisman JE. Three Ca<sup>2+</sup> levels affect plasticity differently: the LTP zone, the LTD zone  
1062 and no man's land. *J Physiol* 2001; **532**(Pt 2): 285.  
1063  
1064 40. Malenka RC, Bear MF. LTP and LTD: an embarrassment of riches. *Neuron* 2004; **44**(1):  
1065 5-21.  
1066  
1067 41. Kauer JA, Malenka RC. Synaptic plasticity and addiction. *Nat Rev Neurosci* 2007; **8**(11):  
1068 844-858.  
1069

- 1070 42. Wang JH, Kelly PT. The balance between postsynaptic Ca(2+)-dependent protein kinase  
1071 and phosphatase activities controlling synaptic strength. *Learn Mem* 1996; **3**(2-3): 170-  
1072 181.  
1073
- 1074 43. Seol GH, Ziburkus J, Huang S, Song L, Kim IT, Takamiya K *et al.* Neuromodulators  
1075 control the polarity of spike-timing-dependent synaptic plasticity. *Neuron*, vol. 552007,  
1076 pp 919-929.  
1077
- 1078 44. Woolfrey KM, Dell'Acqua ML. Coordination of Protein Phosphorylation and  
1079 Dephosphorylation in Synaptic Plasticity. *J Biol Chem* 2015; **290**(48): 28604-28612.  
1080
- 1081 45. Quintana AR, Wang D, Forbes JE, Waxham MN. Kinetics of calmodulin binding to  
1082 calcineurin. *Biochem Biophys Res Commun* 2005; **334**(2): 674-680.  
1083
- 1084 46. Chen X, Vinade L, Leapman RD, Petersen JD, Nakagawa T, Phillips TM *et al.* Mass of  
1085 the postsynaptic density and enumeration of three key molecules. *Proc Natl Acad Sci U*  
1086 *S A* 2005; **102**(32): 11551-11556.  
1087
- 1088 47. Collins MO, Husi H, Yu L, Brandon JM, Anderson CN, Blackstock WP *et al.* Molecular  
1089 characterization and comparison of the components and multiprotein complexes in the  
1090 postsynaptic proteome. *J Neurochem* 2006; **97 Suppl 1**: 16-23.  
1091
- 1092 48. Gerendasy DD, Sutcliffe JG. RC3/neurogranin, a postsynaptic calpacitin for setting the  
1093 response threshold to calcium influxes. *Mol. Neurobiol.*, vol. 151997, pp 131-163.  
1094
- 1095 49. Zhabotinsky AM, Camp RN, Epstein IR, Lisman JE. Role of the neurogranin  
1096 concentrated in spines in the induction of long-term potentiation. *J. Neurosci.*, vol. 26.  
1097 Society for Neuroscience2006, pp 7337-7347.  
1098
- 1099 50. Huang K-P, Huang FL, Jäger T, Li J, Reymann KG, Balschun D. Neurogranin/RC3  
1100 enhances long-term potentiation and learning by promoting calcium-mediated signaling.  
1101 *J. Neurosci.*, vol. 24. Society for Neuroscience2004, pp 10660-10669.  
1102
- 1103 51. van Dalen JJW, Gerendasy DD, de Graan PNE, Schrama LH, Gruol DL. Calcium  
1104 dynamics are altered in cortical neurons lacking the calmodulin-binding protein RC3.  
1105 *Eur. J. Neurosci.*, vol. 182003, pp 13-22.  
1106
- 1107 52. Pak JH, Huang FL, Li J, Balschun D, Reymann KG, Chiang C *et al.* Involvement of  
1108 neurogranin in the modulation of calcium/calmodulin-dependent protein kinase II,  
1109 synaptic plasticity, and spatial learning: a study with knockout mice. *Proc. Natl. Acad.*  
1110 *Sci. U.S.A.*, vol. 97. National Acad Sciences2000, pp 11232-11237.  
1111
- 1112 53. Krucker T, Siggins GR, McNamara RK, Lindsley KA, Dao A, Allison DW *et al.* Targeted  
1113 disruption of RC3 reveals a calmodulin-based mechanism for regulating metaplasticity in  
1114 the hippocampus. *J. Neurosci.*, vol. 222002, pp 5525-5535.  
1115
- 1116 54. Zhong L, Cherry T, Bies CE, Florence MA, Gerges NZ. Neurogranin enhances synaptic  
1117 strength through its interaction with calmodulin. *EMBO J.*, vol. 282009, pp 3027-3039.  
1118



- 1119 55. Zhong L, Gerges NZ. Neurogranin targets calmodulin and lowers the threshold for the  
1120 induction of long-term potentiation. *PLoS ONE*, vol. 7. Public Library of Science2012, p  
1121 e41275.  
1122
- 1123 56. Malenka RC, Kauer JA, Perkel DJ, Mauk MD, Kelly PT, Nicoll RA *et al.* An essential role  
1124 for postsynaptic calmodulin and protein kinase activity in long-term potentiation. *Nature*  
1125 1989; **340**(6234): 554-557.  
1126
- 1127 57. Lee HK, Takamiya K, Han JS, Man H, Kim CH, Rumbaugh G *et al.* Phosphorylation of  
1128 the AMPA receptor GluR1 subunit is required for synaptic plasticity and retention of  
1129 spatial memory. *Cell* 2003; **112**(5): 631-643.  
1130
- 1131 58. Zamanillo D, Sprengel R, Hvalby O, Jensen V, Burnashev N, Rozov A *et al.* Importance  
1132 of AMPA receptors for hippocampal synaptic plasticity but not for spatial learning.  
1133 *Science* 1999; **284**(5421): 1805-1811.  
1134
- 1135 59. Herring BE, Shi Y, Suh YH, Zheng CY, Blankenship SM, Roche KW *et al.* Cornichon  
1136 proteins determine the subunit composition of synaptic AMPA receptors. *Neuron* 2013;  
1137 **77**(6): 1083-1096.  
1138
- 1139 60. Herring BE, Nicoll RA. Long-Term Potentiation: From CaMKII to AMPA Receptor  
1140 Trafficking. *Annu Rev Physiol* 2016; **78**: 351-365.  
1141
- 1142 61. Park J, Chavez AE, Mineur YS, Morimoto-Tomita M, Lutz S, Kim KS *et al.* CaMKII  
1143 Phosphorylation of TARPgamma-8 Is a Mediator of LTP and Learning and Memory.  
1144 *Neuron* 2016; **92**(1): 75-83.  
1145
- 1146 62. Li J, Wilkinson B, Clementel VA, Hou J, O'Dell TJ, Coba MP. Long-term potentiation  
1147 modulates synaptic phosphorylation networks and reshapes the structure of the  
1148 postsynaptic interactome. *Sci Signal* 2016; **9**(440): rs8.  
1149
- 1150 63. Volk L, Chiu SL, Sharma K, Hugarir RL. Glutamate synapses in human cognitive  
1151 disorders. *Annu Rev Neurosci* 2015; **38**: 127-149.  
1152
- 1153 64. Fromer M, Pocklington AJ, Kavanagh DH, Williams HJ, Dwyer S, Gormley P *et al.* De  
1154 novo mutations in schizophrenia implicate synaptic networks. *Nature* 2014; **506**(7487):  
1155 179-184.  
1156
- 1157 65. Cox J, Mann M. Quantitative, high-resolution proteomics for data-driven systems  
1158 biology. *Annual Review of Biochemistry* 2011; **80**(1): 273-299.  
1159
- 1160 66. Mertins P, Qiao JW, Patel J, Udeshi ND, Clauser KR, Mani DR *et al.* Integrated  
1161 proteomic analysis of post-translational modifications by serial enrichment. *Nat Methods*  
1162 2013; **10**(7): 634-637.  
1163
- 1164 67. Rauniyar N, Yates JR, 3rd. Isobaric labeling-based relative quantification in shotgun  
1165 proteomics. *J Proteome Res* 2014; **13**(12): 5293-5309.  
1166
- 1167 68. Feldman DE. The spike-timing dependence of plasticity. *Neuron*, vol. 75. Elsevier2012,  
1168 pp 556-571.



- 1169  
1170 69. Markram H, Lubke J, Frotscher M, Sakmann B. Regulation of synaptic efficacy by  
1171 coincidence of postsynaptic APs and EPSPs. *Science* 1997; **275**(5297): 213-215.  
1172  
1173 70. Bi GQ, Poo MM. Synaptic modifications in cultured hippocampal neurons: dependence  
1174 on spike timing, synaptic strength, and postsynaptic cell type. *J Neurosci* 1998; **18**(24):  
1175 10464-10472.  
1176  
1177 71. Mertins P, Mani DR, Ruggles KV, Gillette MA, Clauser KR, Wang P *et al.*  
1178 Proteogenomics connects somatic mutations to signalling in breast cancer. *Nature* 2016;  
1179 **534**(7605): 55-62.  
1180  
1181 72. Mertins P, Yang F, Liu T, Mani DR, Petyuk VA, Gillette MA *et al.* Ischemia in tumors  
1182 induces early and sustained phosphorylation changes in stress kinase pathways but  
1183 does not affect global protein levels. *Molecular & cellular proteomics : MCP* 2014; **13**(7):  
1184 1690-1704.  
1185  
1186 73. Bayes A, Collins MO, Croning MD, van de Lagemaat LN, Choudhary JS, Grant SG.  
1187 Comparative study of human and mouse postsynaptic proteomes finds high  
1188 compositional conservation and abundance differences for key synaptic proteins. *PLoS*  
1189 *One* 2012; **7**(10): e46683.  
1190  
1191 74. Gene Ontology C. Gene Ontology Consortium: going forward. *Nucleic Acids Res* 2015;  
1192 **43**(Database issue): D1049-1056.  
1193  
1194 75. Ashburner M, Lewis S. On ontologies for biologists: the Gene Ontology--untangling the  
1195 web. *Novartis Found Symp* 2002; **247**: 66-80; discussion 80-63, 84-90, 244-252.  
1196  
1197 76. Yu G, Wang LG, Han Y, He QY. clusterProfiler: an R package for comparing biological  
1198 themes among gene clusters. *OMICS* 2012; **16**(5): 284-287.  
1199  
1200 77. Huang da W, Sherman BT, Lempicki RA. Bioinformatics enrichment tools: paths toward  
1201 the comprehensive functional analysis of large gene lists. *Nucleic Acids Res* 2009;  
1202 **37**(1): 1-13.  
1203  
1204 78. Huang da W, Sherman BT, Lempicki RA. Systematic and integrative analysis of large  
1205 gene lists using DAVID bioinformatics resources. *Nat Protoc* 2009; **4**(1): 44-57.  
1206  
1207 79. Shipton OA, Paulsen O. GluN2A and GluN2B subunit-containing NMDA receptors in  
1208 hippocampal plasticity. *Philos Trans R Soc Lond B Biol Sci* 2014; **369**(1633): 20130163.  
1209  
1210 80. Philpot BD, Cho KK, Bear MF. Obligatory role of NR2A for metaplasticity in visual cortex.  
1211 *Neuron* 2007; **53**(4): 495-502.  
1212  
1213 81. Sakimura K, Kutsuwada T, Ito I, Manabe T, Takayama C, Kushiya E *et al.* Reduced  
1214 hippocampal LTP and spatial learning in mice lacking NMDA receptor epsilon 1 subunit.  
1215 *Nature* 1995; **373**(6510): 151-155.  
1216

- 1217 82. Hosokawa T, Mitsushima D, Kaneko R, Hayashi Y. Stoichiometry and phosphoisotypes  
1218 of hippocampal AMPA-type glutamate receptor phosphorylation. *Neuron* 2015; **85**(1):  
1219 60-67.  
1220
- 1221 83. Kinoshita E, Kinoshita-Kikuta E, Takiyama K, Koike T. Phosphate-binding tag, a new tool  
1222 to visualize phosphorylated proteins. *Molecular & cellular proteomics : MCP* 2006; **5**(4):  
1223 749-757.  
1224
- 1225 84. Milligan CJ, Moller C. Automated planar patch-clamp. *Methods in molecular biology*  
1226 2013; **998**: 171-187.  
1227
- 1228 85. Krupp JJ, Vissel B, Thomas CG, Heinemann SF, Westbrook GL. Interactions of  
1229 calmodulin and alpha-actinin with the NR1 subunit modulate Ca<sup>2+</sup>-dependent  
1230 inactivation of NMDA receptors. *J Neurosci* 1999; **19**(4): 1165-1178.  
1231
- 1232 86. Ehlers MD, Zhang S, Bernhardt JP, Huganir RL. Inactivation of NMDA receptors by direct  
1233 interaction of calmodulin with the NR1 subunit. *Cell* 1996; **84**(5): 745-755.  
1234
- 1235 87. Maki BA, Aman TK, Amico-Ruvio SA, Kussius CL, Popescu GK. C-terminal domains of  
1236 N-methyl-D-aspartic acid receptor modulate unitary channel conductance and gating. *J*  
1237 *Biol Chem* 2012; **287**(43): 36071-36080.  
1238
- 1239 88. Krupp JJ, Vissel B, Thomas CG, Heinemann SF, Westbrook GL. Calcineurin acts via the  
1240 C-terminus of NR2A to modulate desensitization of NMDA receptors.  
1241 *Neuropharmacology*, vol. 422002, pp 593-602.  
1242
- 1243 89. Shi J, Townsend M, Constantine-Paton M. Activity-dependent induction of tonic  
1244 calcineurin activity mediates a rapid developmental downregulation of NMDA receptor  
1245 currents. *Neuron*, vol. 282000, pp 103-114.  
1246
- 1247 90. Townsend M, Liu Y, Constantine-Paton M. Retina-driven dephosphorylation of the NR2A  
1248 subunit correlates with faster NMDA receptor kinetics at developing retinocollicular  
1249 synapses. *J. Neurosci.*, vol. 24. Society for Neuroscience2004, pp 11098-11107.  
1250
- 1251 91. Maki BA, Cole R, Popescu GK. Two serine residues on GluN2A C-terminal tails control  
1252 NMDA receptor current decay times. *Channels (Austin)* 2013; **7**(2): 126-132.  
1253
- 1254 92. Szczepanowska J, Ramachandran U, Herring CJ, Gruschus JM, Qin J, Korn ED *et al.*  
1255 Effect of mutating the regulatory phosphoserine and conserved threonine on the activity  
1256 of the expressed catalytic domain of *Acanthamoeba* myosin I heavy chain kinase. *Proc*  
1257 *Natl Acad Sci U S A* 1998; **95**(8): 4146-4151.  
1258
- 1259 93. Littlepage LE, Wu H, Andresson T, Deanehan JK, Amundadottir LT, Ruderman JV.  
1260 Identification of phosphorylated residues that affect the activity of the mitotic kinase  
1261 Aurora-A. *Proc Natl Acad Sci U S A* 2002; **99**(24): 15440-15445.  
1262
- 1263 94. Zheng W, Zhang Z, Ganguly S, Weller JL, Klein DC, Cole PA. Cellular stabilization of the  
1264 melatonin rhythm enzyme induced by nonhydrolyzable phosphonate incorporation. *Nat*  
1265 *Struct Biol* 2003; **10**(12): 1054-1057.  
1266

- 1267 95. Dai H, Ding H, Meng XW, Lee SH, Schneider PA, Kaufmann SH. Contribution of Bcl-2  
1268 phosphorylation to Bak binding and drug resistance. *Cancer Res* 2013; **73**(23): 6998-  
1269 7008.  
1270  
1271 96. Magee JC, Johnston D. A synaptically controlled, associative signal for Hebbian  
1272 plasticity in hippocampal neurons. *Science*, vol. 2751997, pp 209-213.  
1273  
1274 97. Perouansky M, Yaari Y. Kinetic properties of NMDA receptor-mediated synaptic currents  
1275 in rat hippocampal pyramidal cells versus interneurons. *J Physiol* 1993; **465**: 223-244.  
1276  
1277 98. Stefan MI, Edelstein SJ, Le Novère N. An allosteric model of calmodulin explains  
1278 differential activation of PP2B and CaMKII. *Proc. Natl. Acad. Sci. U.S.A.*, vol. 105.  
1279 National Acad Sciences2008, pp 10768-10773.  
1280  
1281 99. Zeng H, Chattarji S, Barbarosie M, Rondi-Reig L, Philpot BD, Miyakawa T *et al.*  
1282 Forebrain-specific calcineurin knockout selectively impairs bidirectional synaptic  
1283 plasticity and working/episodic-like memory. *Cell* 2001; **107**(5): 617-629.  
1284  
1285 100. Malleret G, Haditsch U, Genoux D, Jones MW, Bliss TV, Vanhoose AM *et al.* Inducible  
1286 and reversible enhancement of learning, memory, and long-term potentiation by genetic  
1287 inhibition of calcineurin. *Cell* 2001; **104**(5): 675-686.  
1288  
1289 101. Huang KP, Huang FL, Li J, Schuck P, McPhie P. Calcium-sensitive interaction between  
1290 calmodulin and modified forms of rat brain neurogranin/RC3. *Biochemistry*, vol. 392000,  
1291 pp 7291-7299.  
1292  
1293 102. Gaertner TR, Putkey JA, Waxham MN. RC3/Neurogranin and Ca<sup>2+</sup>/calmodulin-  
1294 dependent protein kinase II produce opposing effects on the affinity of calmodulin for  
1295 calcium. *J. Biol. Chem.*, vol. 2792004, pp 39374-39382.  
1296  
1297 103. Kubota Y, Putkey JA, Waxham MN. Neurogranin controls the spatiotemporal pattern of  
1298 postsynaptic Ca<sup>2+</sup>/CaM signaling. *Biophys. J.*, vol. 932007, pp 3848-3859.  
1299  
1300 104. Yuste R, Denk W. Dendritic spines as basic functional units of neuronal integration.  
1301 *Nature* 1995; **375**(6533): 682-684.  
1302  
1303 105. Watson JB, Sutcliffe JG, Fisher RS. Localization of the protein kinase C  
1304 phosphorylation/calmodulin-binding substrate RC3 in dendritic spines of neostriatal  
1305 neurons. *Proc. Natl. Acad. Sci. U.S.A.*, vol. 891992, pp 8581-8585.  
1306  
1307 106. Tovar KR, Westbrook GL. The incorporation of NMDA receptors with a distinct subunit  
1308 composition at nascent hippocampal synapses in vitro. *J Neurosci* 1999; **19**(10): 4180-  
1309 4188.  
1310  
1311 107. Vicini S, Wang JF, Li JH, Zhu WJ, Wang YH, Luo JH *et al.* Functional and  
1312 pharmacological differences between recombinant N-methyl-D-aspartate receptors. *J*  
1313 *Neurophysiol* 1998; **79**(2): 555-566.  
1314

- 1315 108. Philpot BD, Sekhar AK, Shouval HZ, Bear MF. Visual experience and deprivation  
1316 bidirectionally modify the composition and function of NMDA receptors in visual cortex.  
1317 *Neuron* 2001; **29**(1): 157-169.  
1318
- 1319 109. Flint AC, Maisch US, Weishaupt JH, Kriegstein AR, Monyer H. NR2A subunit expression  
1320 shortens NMDA receptor synaptic currents in developing neocortex. *J Neurosci* 1997;  
1321 **17**(7): 2469-2476.  
1322
- 1323 110. Punnakkal P, Jendritza P, Kohr G. Influence of the intracellular GluN2 C-terminal domain  
1324 on NMDA receptor function. *Neuropharmacology* 2012; **62**(5-6): 1985-1992.  
1325
- 1326 111. Huang FL, Huang K-P, Boucheron C. Long-term enrichment enhances the cognitive  
1327 behavior of the aging neurogranin null mice without affecting their hippocampal LTP.  
1328 *Learn. Mem.*, vol. 14. Cold Spring Harbor Lab2007, pp 512-519.  
1329
- 1330 112. Ressler KJ, Paschall G, Zhou X-I, Davis M. Regulation of synaptic plasticity genes  
1331 during consolidation of fear conditioning. *J. Neurosci.*, vol. 222002, pp 7892-7902.  
1332
- 1333 113. Krueger DD, Nairn AC. Expression of PKC substrate proteins, GAP-43 and neurogranin,  
1334 is downregulated by cAMP signaling and alterations in synaptic activity. *Eur. J.*  
1335 *Neurosci.*, vol. 262007, pp 3043-3053.  
1336
- 1337 114. Kaleka KS, Gerges NZ. Neurogranin restores amyloid beta-mediated synaptic  
1338 transmission and long-term potentiation deficits. *Exp Neurol* 2016; **277**: 115-123.  
1339
- 1340 115. Makino Y, Johnson RC, Yu Y, Takamiya K, Huganir RL. Enhanced synaptic plasticity in  
1341 mice with phosphomimetic mutation of the GluA1 AMPA receptor. *Proc. Natl. Acad. Sci.*  
1342 *U.S.A.*, vol. 108. National Acad Sciences2011, pp 8450-8455.  
1343
- 1344 116. Pan JQ, Baez-Nieto D, Allen A, Wang HR, Cottrell JR. Developing High-Throughput  
1345 Assays to Analyze and Screen Electrophysiological Phenotypes. *Methods in molecular*  
1346 *biology* 2018; **1787**: 235-252.  
1347
- 1348 117. Rappsilber J, Mann M, Ishihama Y. Protocol for micro-purification, enrichment, pre-  
1349 fractionation and storage of peptides for proteomics using StageTips. *Nat Protoc* 2007;  
1350 **2**(8): 1896-1906.  
1351
- 1352 118. Cox J, Mann M. Quantitative, high-resolution proteomics for data-driven systems  
1353 biology. *Annu Rev Biochem* 2011; **80**: 273-299.  
1354
- 1355 119. Elias JE, Gibbons FD, King OD, Roth FP, Gygi SP. Intensity-based protein identification  
1356 by machine learning from a library of tandem mass spectra. *Nat Biotechnol* 2004; **22**(2):  
1357 214-219.  
1358
- 1359 120. Nesvizhskii AI, Aebersold R. Interpretation of shotgun proteomic data: the protein  
1360 inference problem. *Molecular & cellular proteomics : MCP* 2005; **4**(10): 1419-1440.  
1361
- 1362 121. Ritchie ME, Phipson B, Wu D, Hu Y, Law CW, Shi W *et al.* limma powers differential  
1363 expression analyses for RNA-sequencing and microarray studies. *Nucleic Acids Res*  
1364 2015; **43**(7): e47.

1365  
1366  
1367  
1368  
1369

122. Smyth GK. Linear models and empirical bayes methods for assessing differential expression in microarray experiments. *Stat Appl Genet Mol Biol* 2004; **3**: Article3.

# Hwang et al. Figure 1

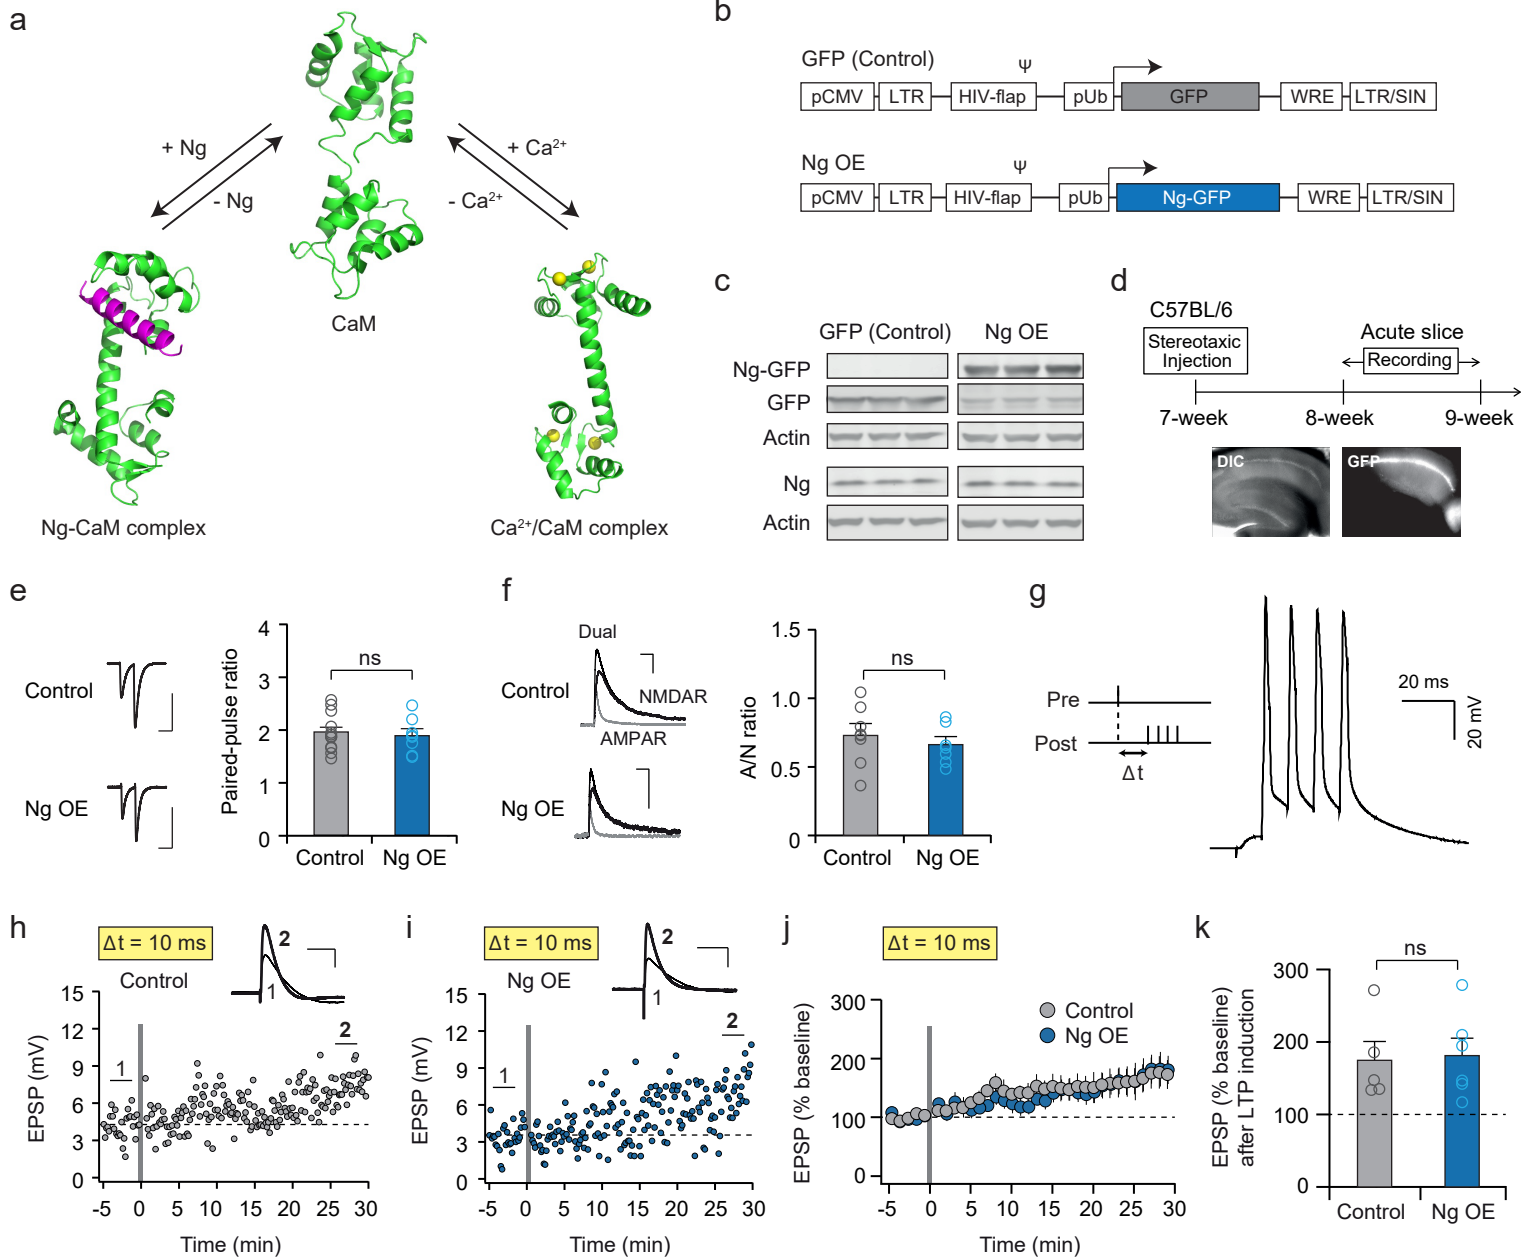

# Hwang et al. Figure 2

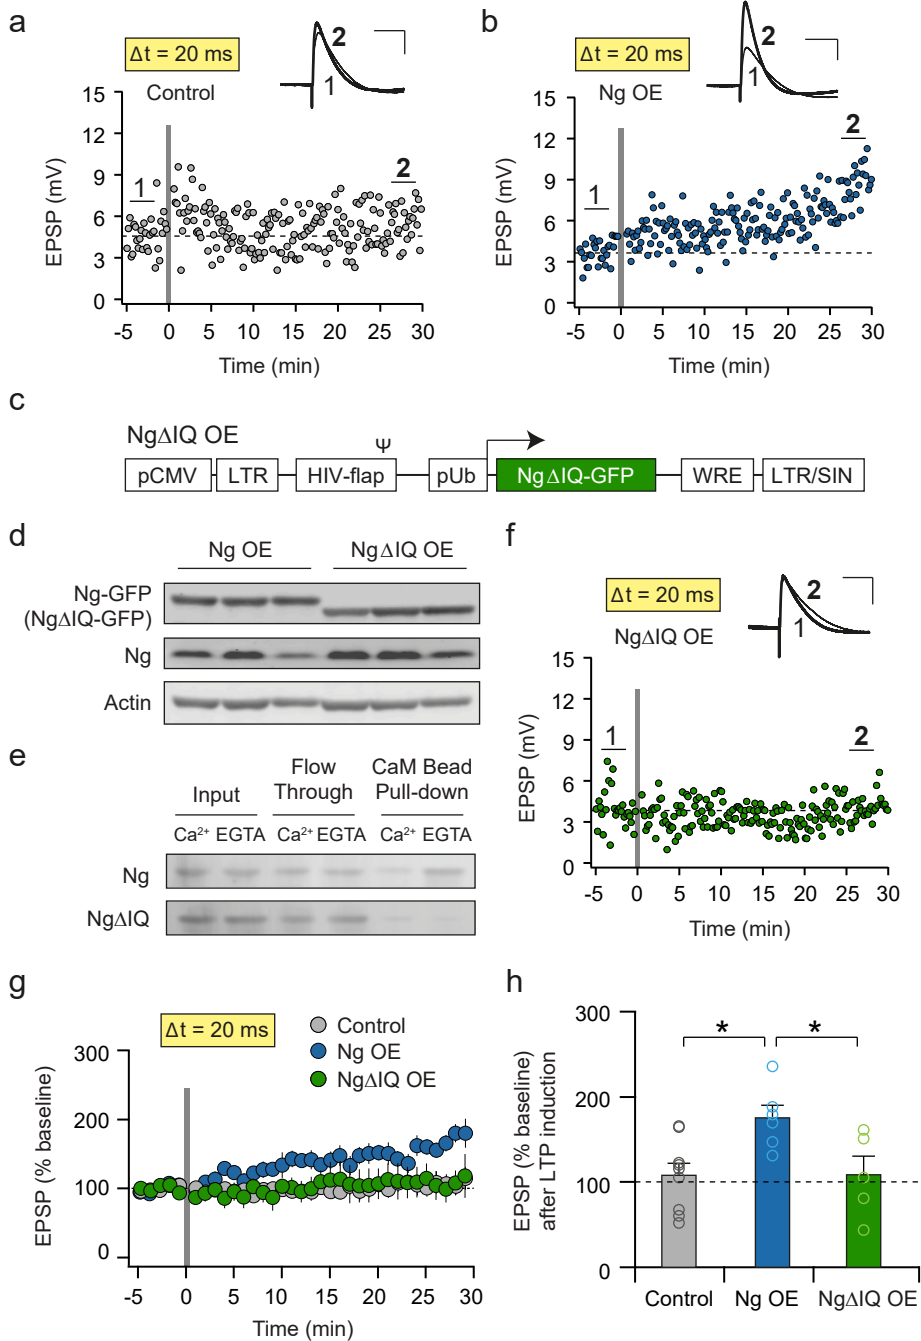

# Hwang et al. Figure 3

a

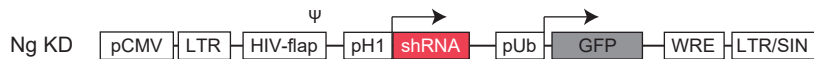

b

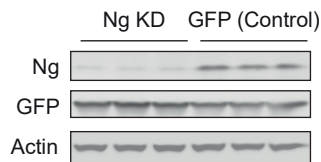

c

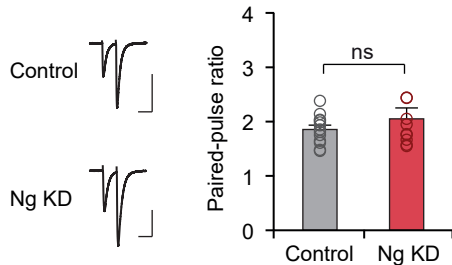

d

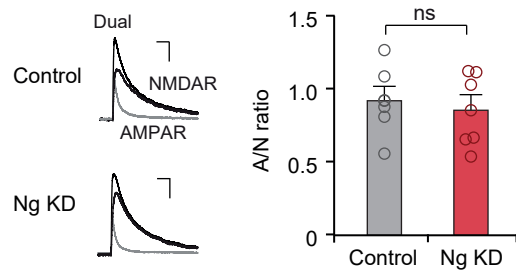

e

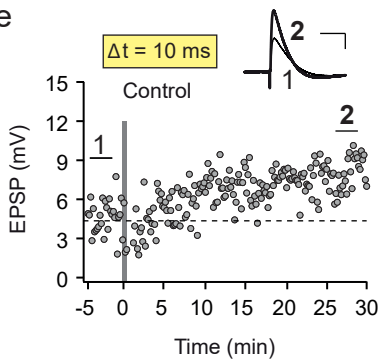

f

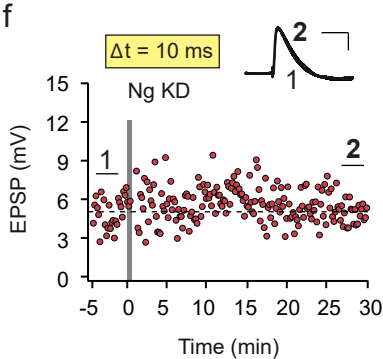

g

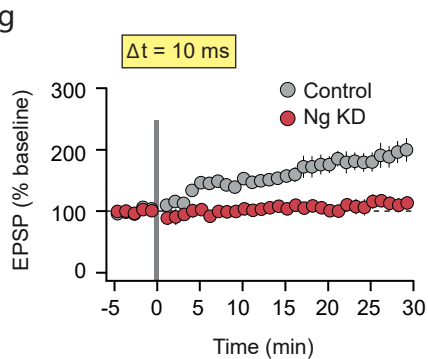

h

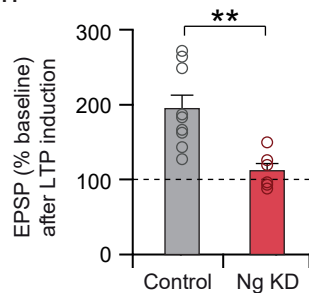



# Hwang et al. Figure 4

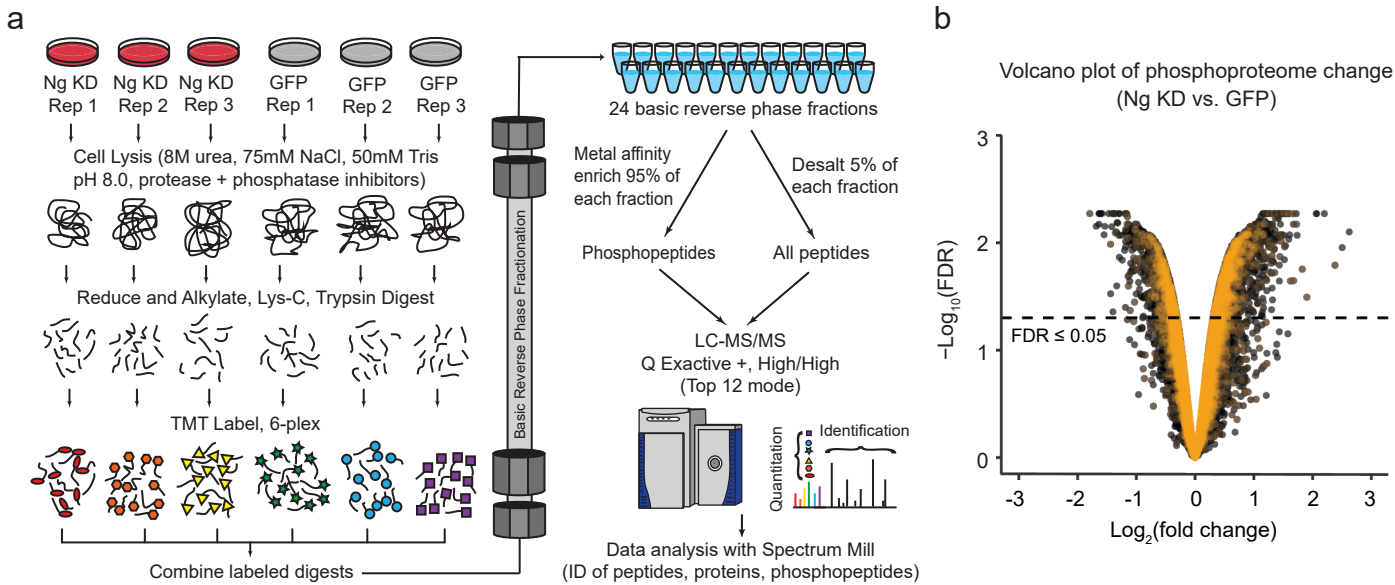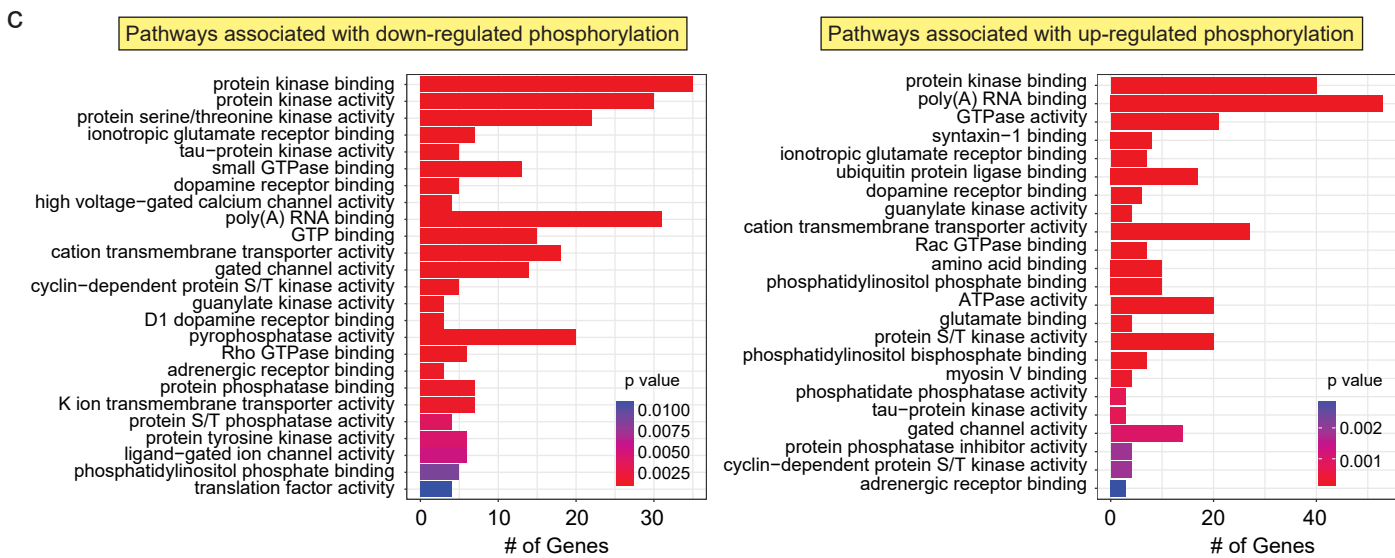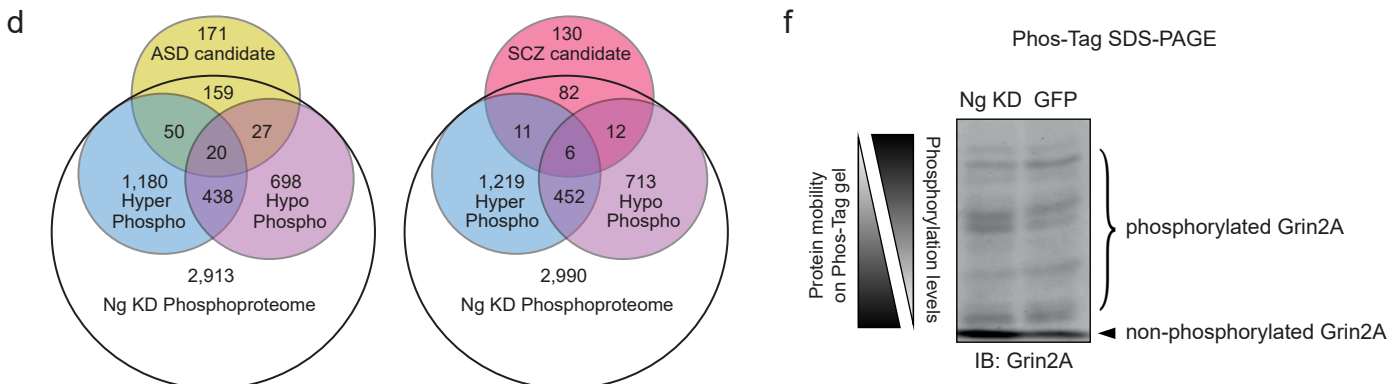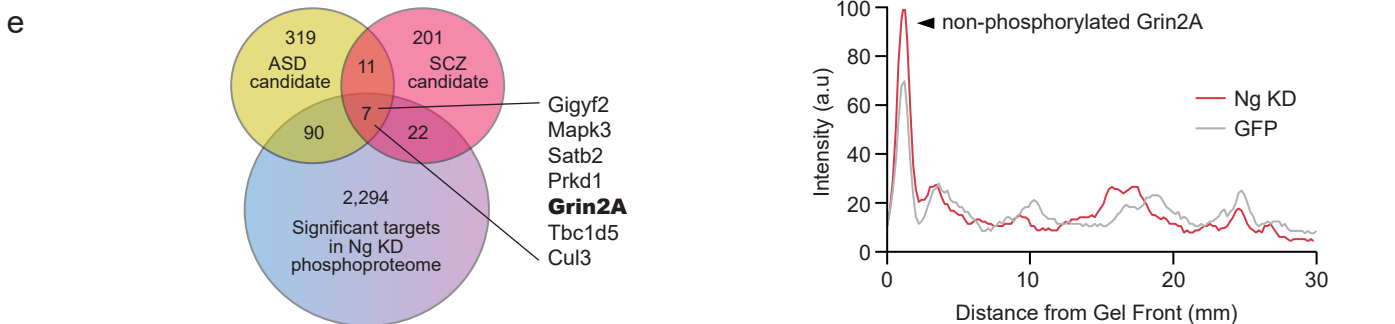

# Hwang et al. Figure 5

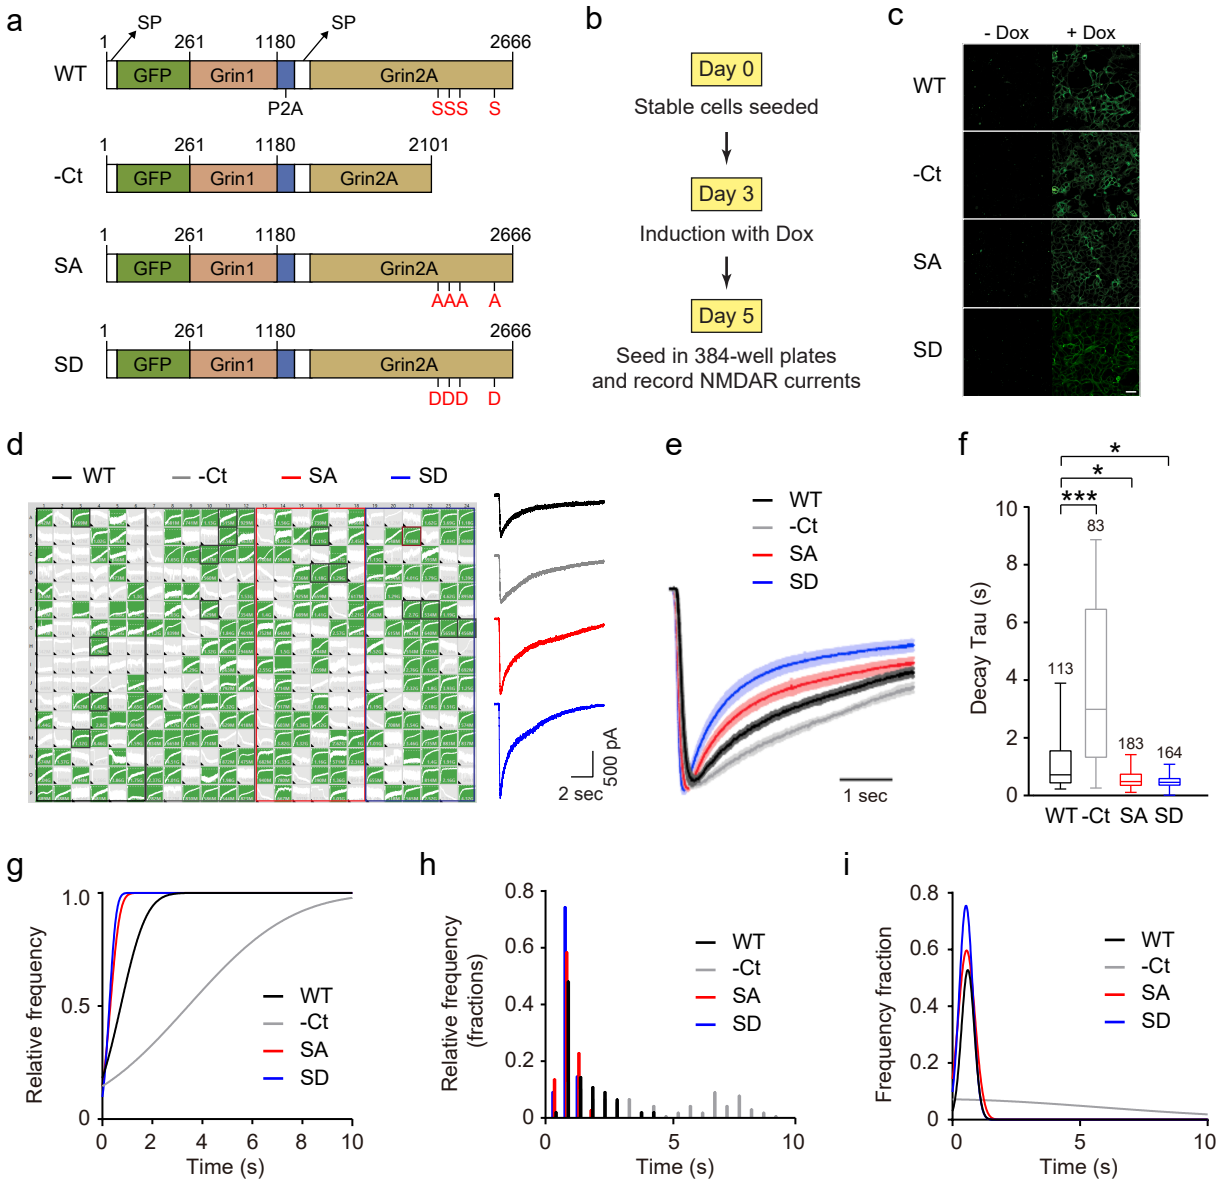

# Hwang et al. Figure 6

a

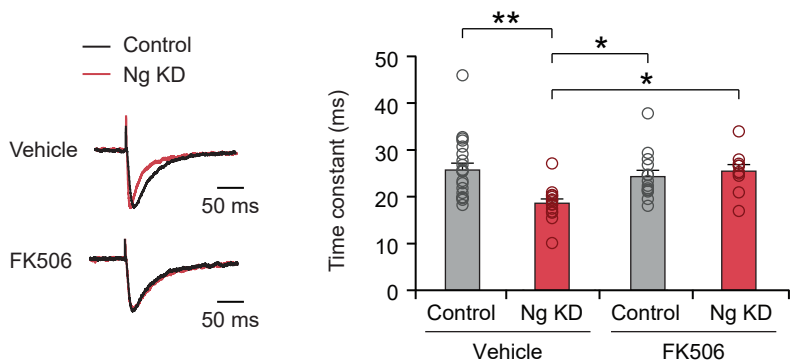

b

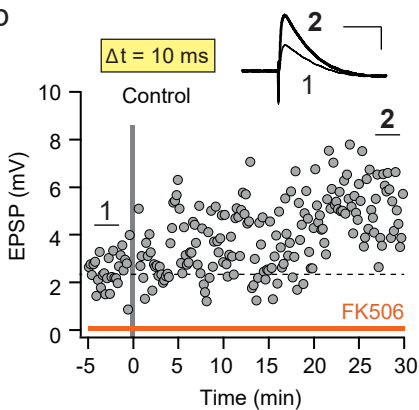

c

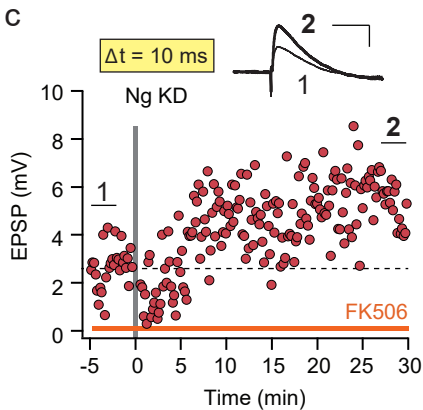

d

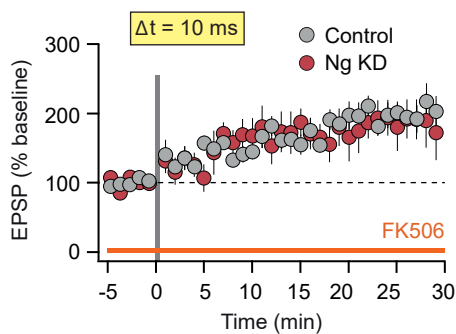

e

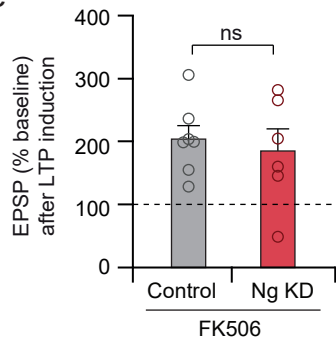

# Hwang et al. Figure 7

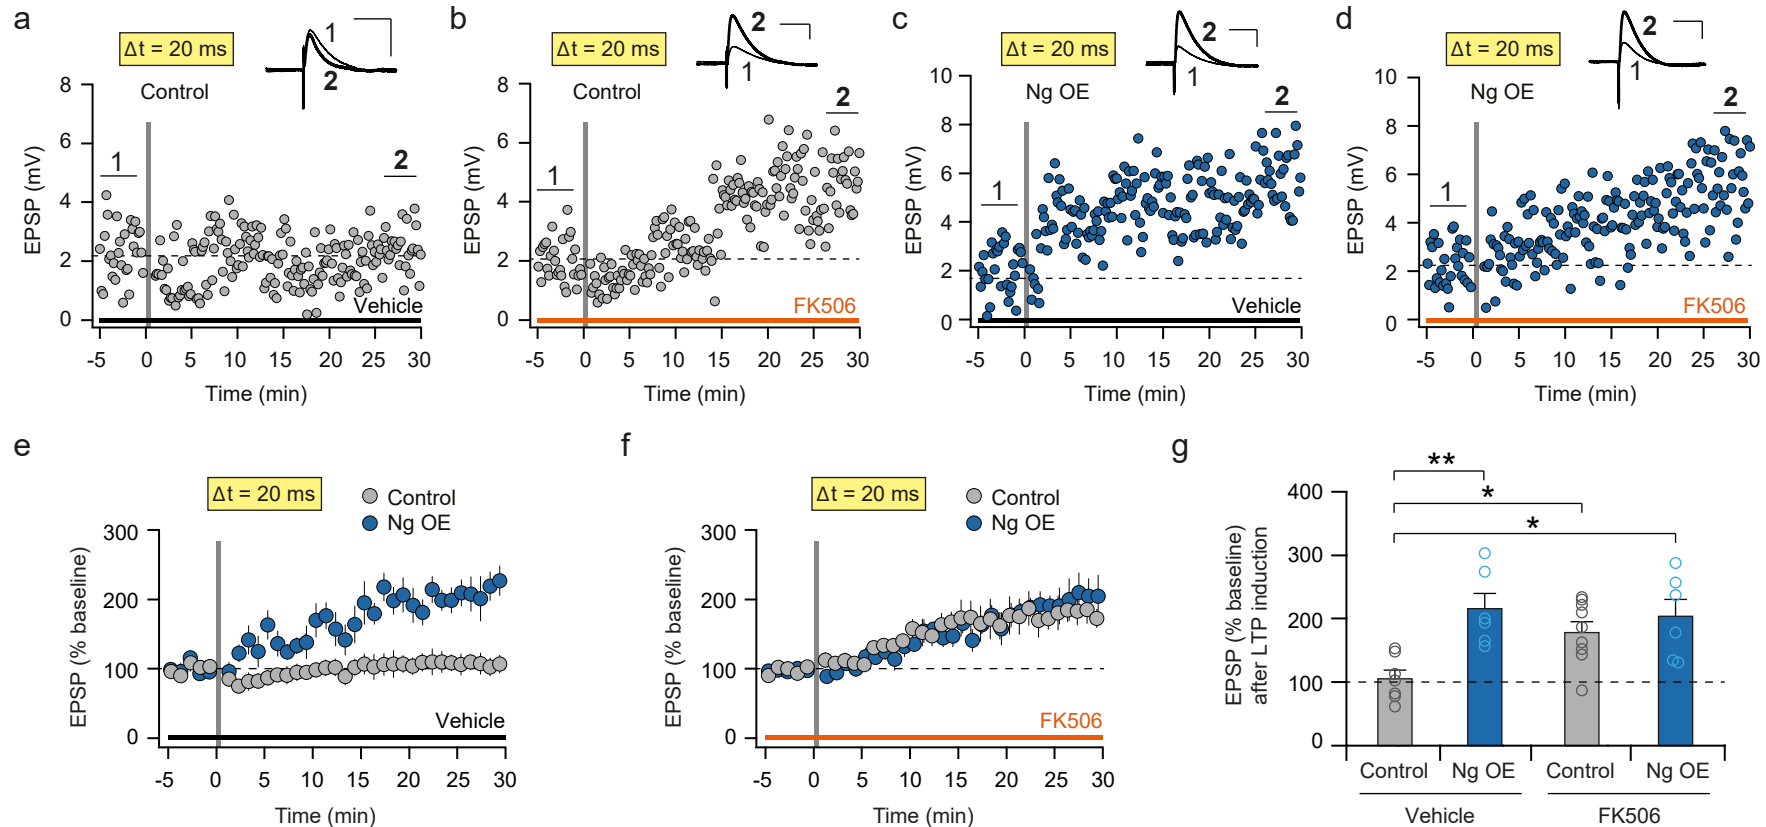

# Hwang et al. Figure S1

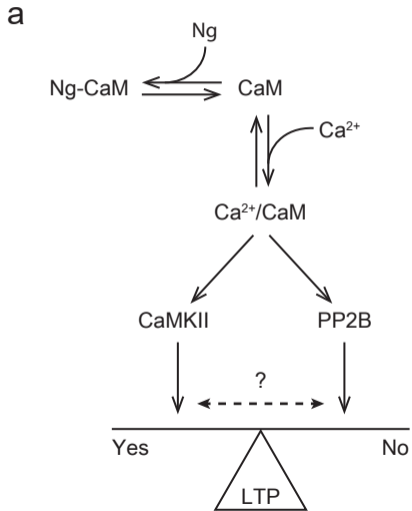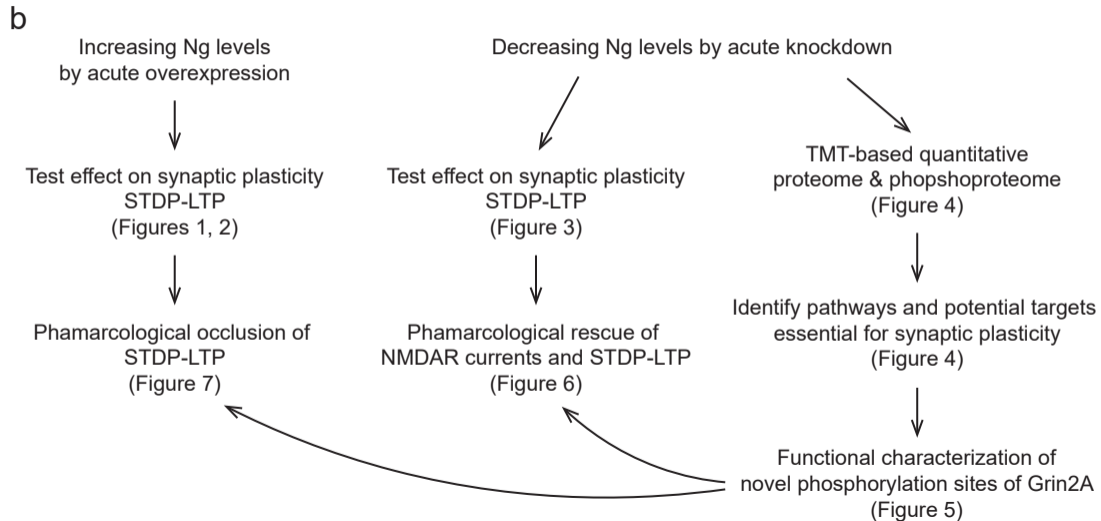

# Hwang et al. Figure S2

bioRxiv preprint doi: <https://doi.org/10.1101/481291>; this version posted November 29, 2018. The copyright holder for this preprint (which was not certified by peer review) is the author/funder. All rights reserved. No reuse allowed without permission.

**a**

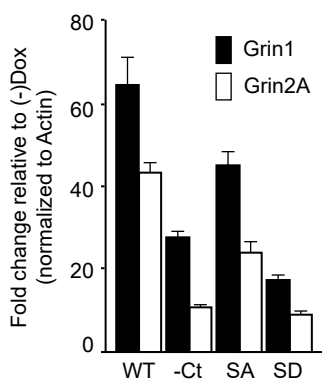

**b**

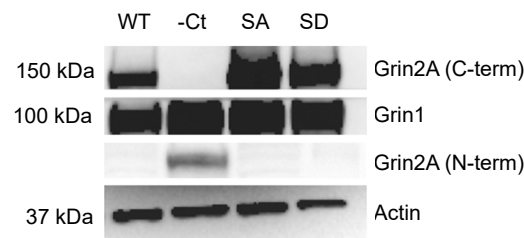

**c**

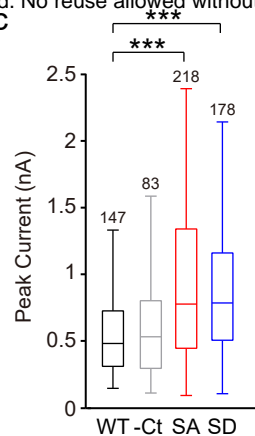

**d**

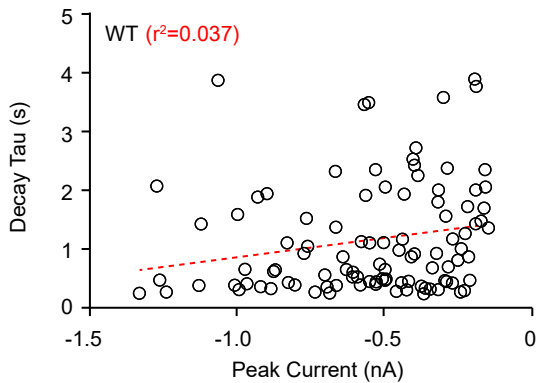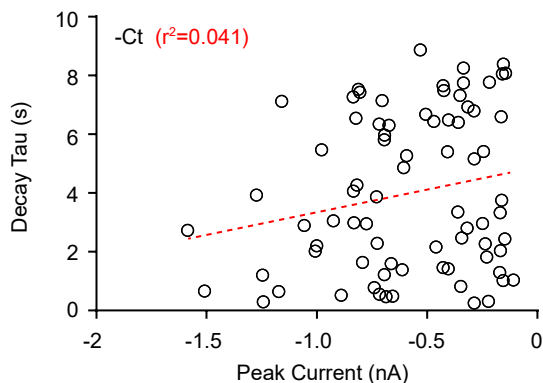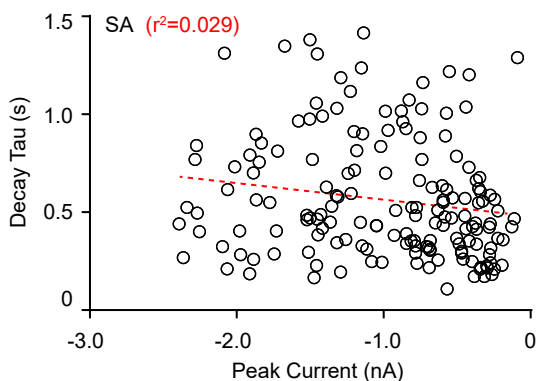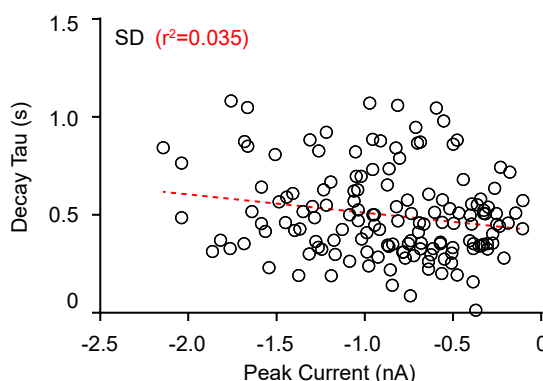

**e**

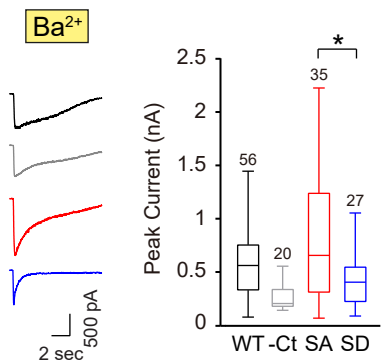

**f**

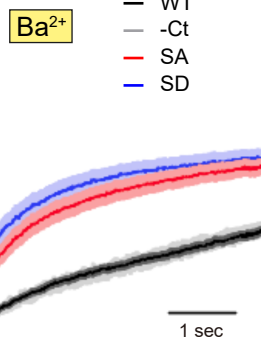

**g**

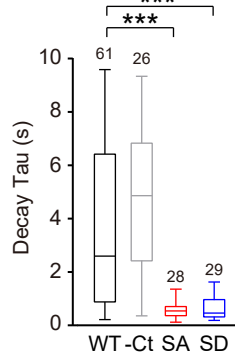

**h**

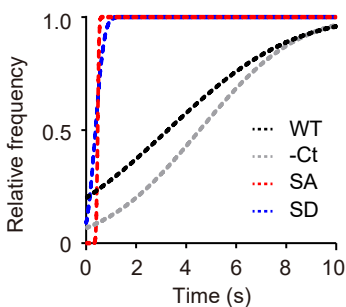

**i**

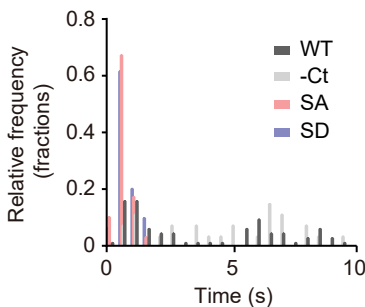

**j**

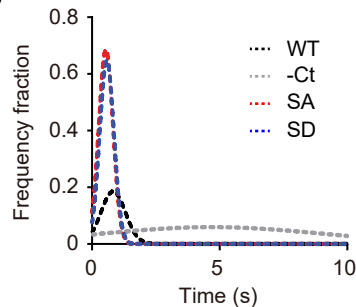

# Hwang et al. Figure S3

**a**

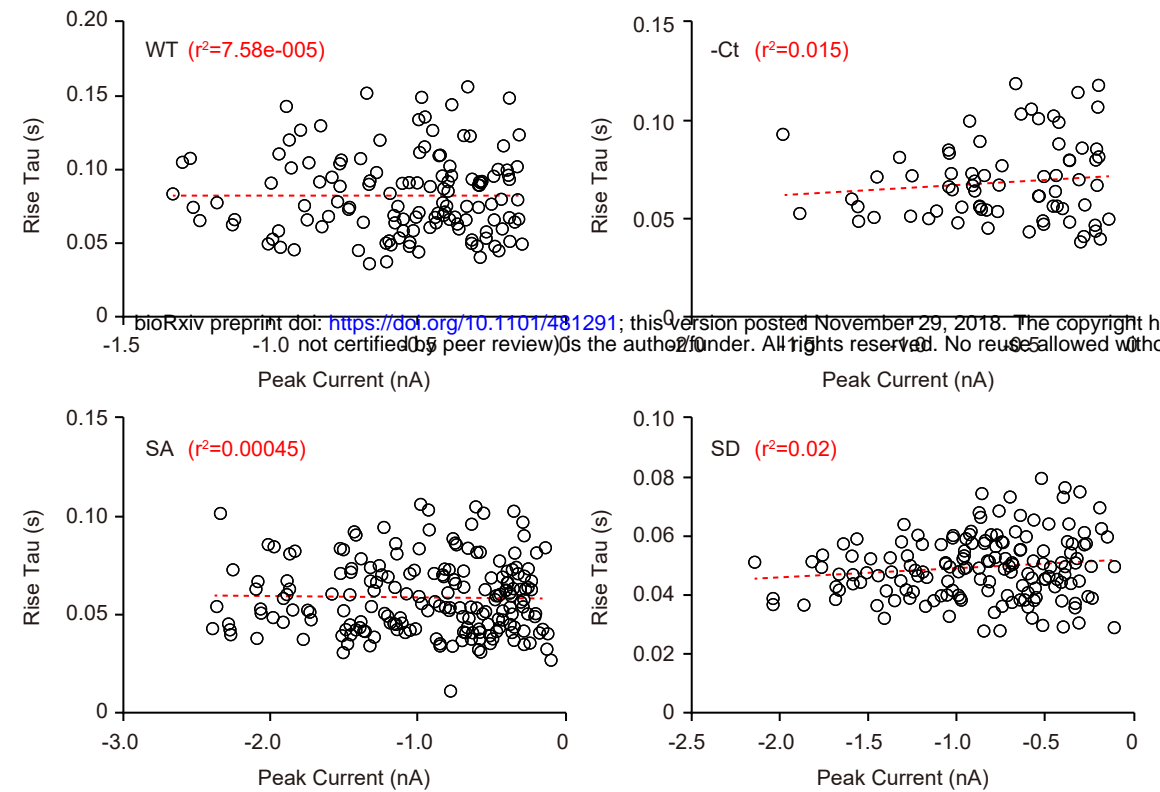

**b**

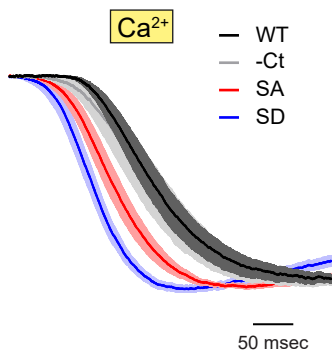

**c**

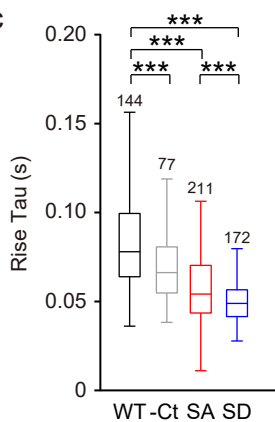

**d**

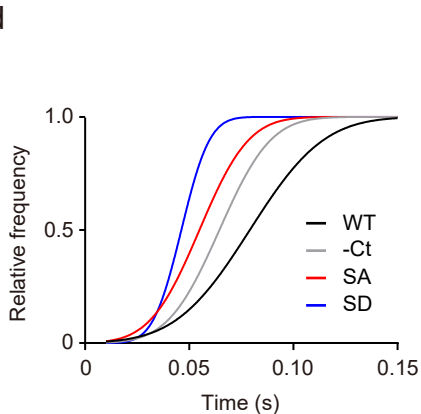

**e**

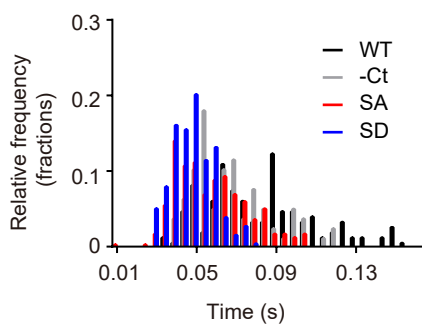

**f**

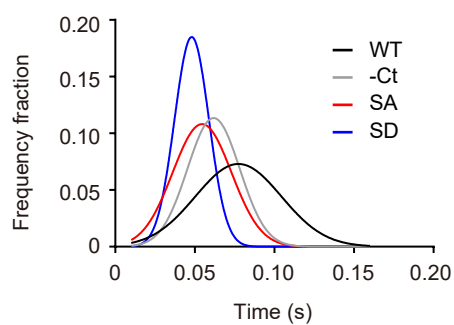

**g**

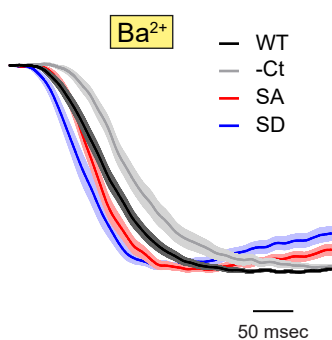

**h**

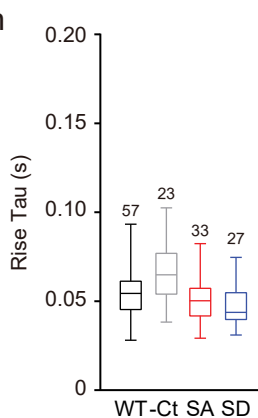

**i**

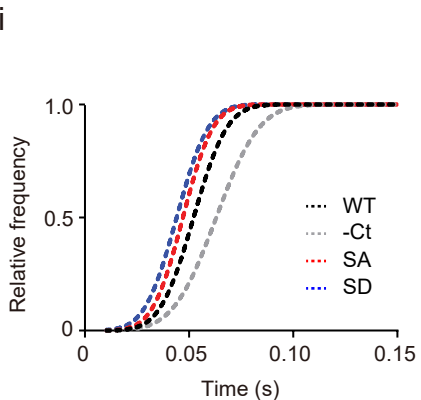

**j**

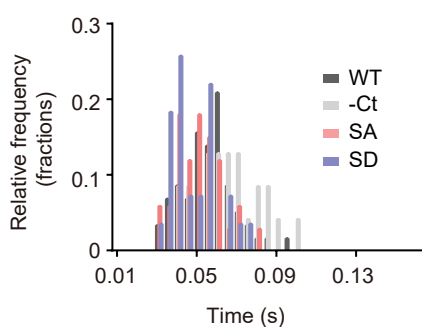

**k**

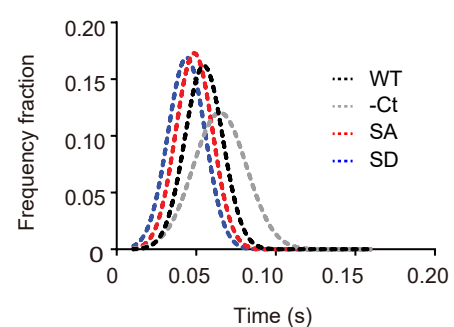

# Hwang et al. Figure S4

a

Decrease of Ng

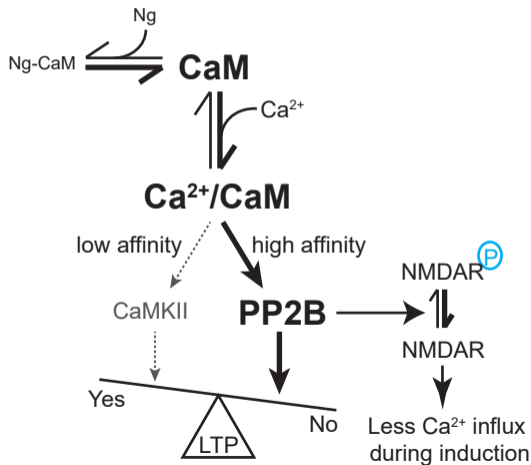

b

Increase of Ng

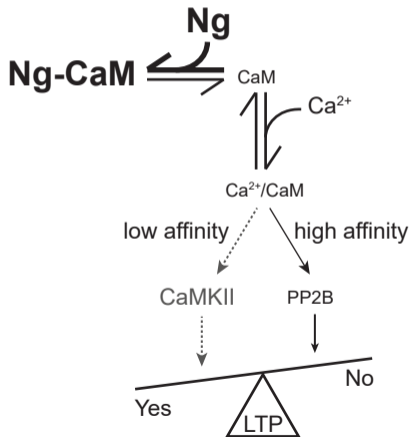



Hwang et al.

**Supplementary Fig. 1 | Schematic model of influence of Ng on CaM, and the experimental flow.**

(a) The schematic model of the effect of Ng on relative activation of  $\text{Ca}^{2+}$ /CaM-dependent CaMKII and PP2B that control the expression of LTP.

(b) The experimental flow. Lentivirus-mediated acute knockdown and overexpression were used to test the effect of Ng levels on synaptic plasticity using STDP-LTP protocol at Schaffer Collateral-CA1 synapses (Figures 1-3). Acute knockdown approach was used for TMT-based quantitative proteomics and phosphoproteomics to analyze how decreasing Ng levels influences the neuronal phosphorylation landscape, and pathway analyses identified potential targets essential for synaptic plasticity, including Grin2A (Figure 4). Interestingly, Ng KD caused hypophosphorylation of Grin2A in the C-terminus, and high-throughput planar patch clamp revealed that the phosphorylation sites in the Grin2A C-terminus identified from the phosphoproteome analysis play a critical role in regulating the peak and decay of NMDAR-mediated calcium influx (Figure 5). Lastly, pharmacological approaches were used to validate the potential downstream targets in both the acute knockdown and overexpression conditions (Figures 6, 7).

Hwang et al.

**Supplementary Fig. 2 | Validation of inducible expression of WT NMDAR and mutants.**

(a) qPCR validation of Grin1 and Grin2A expression two days post-induction with doxycycline. Data are represented as the fold change in mRNA expression compared to non-induced parallel cultures normalized to  $\beta$ -actin.

(b) Western validation of Grin1 and Grin2A expression two days post induction with doxycycline. The C-terminus deletion mutant was blotted with a polyclonal antibody raised against the N-terminus of Grin2A as the C-terminal epitope recognized by the superior monoclonal antibody is not present in this mutant.

(c) Box plots of peak current values of NMDAR currents recorded from the cell lines with Grin2A WT, and -Ct, SA and SD mutants. Data were compared via one-way ANOVA and significance was calculated with the Holmes-Sidak multi-comparisons test. \*\*\* $p < 0.001$ .

(d) Linear regression of the correlation between peak current and decay tau for the recordings from NMDAR WT and mutants show no significant correlation between current size and decay kinetics. Dotted lines represent linear regression fits, and the value of  $r^2$  for each fit is less than 0.05 demonstrating the poor correlation between current amplitude and decay kinetics.

(e) Left: Representative recordings of NMDAR-mediated currents recorded in  $Ba^{2+}$  containing solution, using planar patch clamp. Right: Box plots of peak current values of NMDAR currents recorded in  $Ba^{2+}$  containing solution from the cell lines with Grin2A WT, and -Ct, SA and SD mutants. Data were compared via one-way ANOVA and significance was calculated with the Holmes-Sidak multi-comparisons test. \* $p < 0.05$ .

(f) Average traces of NMDAR currents recorded in  $Ba^{2+}$  containing solution from the cell lines with Grin2A WT and mutants, normalized to peak current highlight differences in decay kinetics in -Ct, SA and SD mutants. Shaded bands represent SEM.

Hwang et al.

(g) Box plots of decay Tau values of NMDAR currents recorded in Ba<sup>2+</sup> containing solution from the cell lines with Grin2A WT and mutants. Data were compared via one-way ANOVA and significance was calculated with the Holmes-Sidak multi-comparisons test. \*\*\* $p < 0.001$ .

(h-j) Gaussian fits of the cumulative distribution of decay kinetics (h), probability density histograms of decay kinetics (i) and its Gaussian fits (j) from the Ba<sup>2+</sup> recordings, demonstrate Gaussian distributions for all experimental conditions except for WT and -Ct.

Hwang et al.

**Supplementary Fig. 3 | C-terminal phosphorylation of Grin2A regulates the activation kinetics of NMDAR-mediated calcium influx.**

(a) Linear regression of the correlation between peak current and rise tau for the recordings from the cell lines with Grin2A WT and mutants show no significant correlation between current size and rise kinetics. Dotted lines represent linear regression fits, and the value of  $r^2$  for each fit is less than 0.05 demonstrating the poor correlation between current amplitude and rise kinetics.

(b) Average traces of NMDAR currents recorded from the cell lines with Grin2A WT and mutants, normalized to peak current highlight the differences in rise kinetics in –Ct, SA and SD mutants.

(c) Box plots of rise Tau values of NMDAR currents from the cell lines with Grin2A WT and mutants. Data were compared via one-way ANOVA and significance was calculated with the Holmes-Sidak multi-comparisons test. \*\*\* $p < 0.001$ .

(d-f) Gaussian fits of the cumulative distribution (d), probability density histograms (e) and its Gaussian fits (f) of rise kinetics demonstrates Gaussian distributions for all experimental conditions.

(g) Average traces of NMDAR currents recorded in  $Ba^{2+}$  containing solutions from the cell lines with Grin2A WT and mutants, normalized to peak current highlight the differences in rise kinetics in –Ct, SA and SD mutants.

(h) Box plots of rise Tau values of NMDAR currents recorded in  $Ba^{2+}$  containing solutions from the cell lines with Grin2A WT and mutants. Data were compared via one-way ANOVA and significance was calculated with the Holmes-Sidak multi-comparisons test.

(i-k) Gaussian fits of the cumulative distribution (i), probability density histograms (j) and its Gaussian fits (k) of rise kinetics in  $Ba^{2+}$  condition, demonstrates Gaussian distributions for all experimental conditions.

Hwang et al.

**Supplementary Fig. 4 | Schematic model demonstrating the effect of Ng levels on LTP.**

- (a) Decrease of Ng leads to heightened PP2B activity in neurons, which dephosphorylates the NMDAR subunit Grin2A, and accelerates the decay of synaptic NMDAR currents, thus decreasing  $\text{Ca}^{2+}$  influx through NMDARs. The changes in this cascade leads to deficit in LTP.
- (b) Increase of Ng decreases basal PP2B activity and lowers the threshold of LTP.

Hwang et al.

**Supplementary Table 1** | Phosphorylation sites (P-sites) coverage with Ng knockdown.

| Phosphorylation sites (normalized)                       |      |              |                  |
|----------------------------------------------------------|------|--------------|------------------|
|                                                          |      |              | Overlap with PSD |
| P-sites identified                                       |      | 29,560       | 9,269 (32%)      |
| Phospho-proteins                                         |      | 5,485        | 1,077            |
| P-sites regulated (phosphoproteins)<br>(FDR $\leq$ 0.05) | Up   | 2,896 (1688) | 951 (460)        |
|                                                          | Down | 1,848 (1183) | 529 (312)        |

Hwang et al.

**Supplementary Table 2** | Significantly regulated P-sites in ASD targets affected by Ng knockdown.

| Down-regulated P-sites |            |                                                           |
|------------------------|------------|-----------------------------------------------------------|
| Functional Category    | Gene       | Phosphorylation sites*                                    |
| Synapse                | GRIN2A     | S1384                                                     |
|                        | HOMER1     | S91/S97                                                   |
|                        | RIMS1      | S526, S563, S1081/S1082, S1102, T1170, S1219/S1224, S1342 |
|                        | SHANK1     | S806                                                      |
|                        | SHANK2     | S839                                                      |
|                        | SHANK3     | S557/T559, S771, S985                                     |
| GTPase Regulation      | AGAP1      | S239, S415/S421, T836, S840                               |
|                        | NF1        | S2812                                                     |
|                        | SYNGAP1    | S117, S155, S779/S780, S817, S825, S1183                  |
|                        | TBC1D5     | S565/S568, T728                                           |
|                        | TTN        | S17523/T17538                                             |
| Ion Channels           | CACNA1D    | S994/S995/S998                                            |
|                        | CACNA1E    | S43, S737/S746                                            |
|                        | KCNQ3      | S422                                                      |
|                        | SCN1A      | S537, T544, S1939                                         |
| Other                  | ADNP       | S607                                                      |
|                        | AGBL4      | S122                                                      |
|                        | ANK2       | S7                                                        |
|                        | APBA2      | T307, S479/T487, S481                                     |
|                        | ATRX       | S1089, S828S829                                           |
|                        | CDC42BPB   | T423, S1661                                               |
|                        | CDKL5      | S761                                                      |
|                        | CNR1       | T314S317                                                  |
|                        | DMXL2      | S930                                                      |
|                        | DSCAM      | S184, S1989                                               |
|                        | HYDIN      | T3277                                                     |
|                        | KDM5B      | T263, S1456                                               |
|                        | KHDRBS2    | S38                                                       |
|                        | LZTR1      | S354                                                      |
|                        | MBD3       | S85                                                       |
|                        | MEF2C      | S222, T403                                                |
|                        | MYO16      | S1464, S320                                               |
|                        | NIPBL      | T646, S1036                                               |
|                        | PACS1      | S18, T44, S493, S517                                      |
|                        | PHRF1      | S773                                                      |
| PRKCB                  | T642, S654 |                                                           |

Hwang et al.

|                             | PRKD1   | S427/Y437/T439                       |
|-----------------------------|---------|--------------------------------------|
|                             | PTPN11  | Y62, Y546, T547                      |
|                             | RAI1    | T1516S1520                           |
|                             | SBF1    | S1047                                |
|                             | SLC6A8  | T623/T625/S628                       |
|                             | SPARCL1 | S78                                  |
|                             | SYNE1   | T1819S1826S1830                      |
|                             | TRIO    | S1258, S2458                         |
|                             | TSC2    | T1334                                |
|                             | UBE3C   | S20                                  |
|                             | VPS13B  | S1792, S998S1001                     |
| <b>Up-regulated P-Sites</b> |         |                                      |
| Functional Category         | Gene    | Phosphorylation sites*               |
| Synapse                     | DMXL2   | S1157, S1399/S1403, S1915            |
|                             | GRIN2A  | S882S890                             |
|                             | HOMER1  | S53, T66                             |
|                             | NBEA    | S1723, T2079                         |
|                             | NRCAM   | T1173/S1178, S1242                   |
|                             | NRXN1   | S1469                                |
|                             | SCN1A   | S565                                 |
|                             | SHANK1  | S534, S564, S662, S1433              |
|                             | SHANK2  | S724, T903, S1238, S1388/S1390/S1392 |
|                             | SLC12A5 | S1021/S1024/S1025                    |
|                             | SPARCL1 | S70/S78, S155, Y349/S353, S406       |
|                             | SYN1    | S578, S666/S684                      |
|                             | SYNGAP1 | S534, S535, S1070                    |
| SYT17                       | S115    |                                      |
| Development                 | PTEN    | S385                                 |
|                             | TSC1    | S1074                                |
| Kinase Pathway              | BRAF    | T317, S483S484                       |
|                             | MAPK3   | T203Y205                             |
|                             | MARK1   | S219                                 |
|                             | MTOR    | T2384, S2478                         |
|                             | PRKCB   | T48, S279                            |
|                             | PRKD1   | S203, S748                           |
|                             | PTEN    | S385                                 |
|                             | SBF1    | S20                                  |
|                             | TRIO    | S1818S1821T1824                      |
| Ion Channels                | CACNA1H | S541, S1104                          |
|                             | CACNA1D | S869, S1679, S1940, S2064            |
|                             | CACNA1G | S2252                                |



Hwang et al.

|       |          |                              |
|-------|----------|------------------------------|
|       | SCN1A    | S565                         |
|       | ACE      | S1305                        |
|       | ADCY5    | S156                         |
|       | ANK2     | S3936                        |
|       | ATRX     | S896, S1041, S1287S1290      |
|       | BCL11A   | S625                         |
|       | BZRAP1   | S291                         |
|       | CAPRIN1  | S304S305                     |
|       | CCDC88C  | S1824, S1863                 |
|       | CDH8     | S795                         |
|       | CUL3     | S478                         |
|       | DDX3X    | S131                         |
|       | DNMT3A   | S386S389, S890               |
|       | DOCK1    | S1681                        |
|       | DPP6     | S102                         |
|       | ERBB2IP  | S849, S869, S929             |
|       | GALNT14  | S524                         |
|       | GIGYF1   | S756                         |
|       | GIGYF2   | T383                         |
|       | HECW2    | S220                         |
|       | HEPACAM  | Y283, T297/S301, S321, S352  |
|       | HERC2    | S1566/S1569, S4130           |
| Other | IRF2BP1  | S13                          |
|       | KMT2C    | S2823, S4060                 |
|       | KMT2E    | S845                         |
|       | LZTS2    | S296                         |
|       | NCKAP1   | S897                         |
|       | NDUFA5   | S89, S99                     |
|       | NF1      | S2498                        |
|       | NIPBL    | T713, T724, T735             |
|       | PACS1    | S664                         |
|       | PHF2     | S458, S899                   |
|       | PHRF1    | S1045                        |
|       | PLCB1    | S236, S308, S569, S811, T831 |
|       | PRICKLE2 | T182, S788                   |
|       | RAB2A    | Y3                           |
|       | RAI1     | T455                         |
|       | SATB2    | S13                          |
|       | SLC38A10 | S441, S866, S991             |
|       | SLC6A1   | S14                          |
|       | SLC9A6   | S607                         |
|       | SYNE1    | S5952, S8279S8282            |
|       | ZBTB20   | T305                         |
|       | ZMYND11  | S446                         |

Hwang et al.

\*Slash (/) indicates that the exact phosphorylation sites could not be unambiguously determined due to the presence of multiple potential phosphorylation sites on a single peptide. Multiple sites without (/) indicate multiple simultaneous phosphorylation within the phosphopeptide.

Hwang et al.

**Supplementary Table 3** | Significantly regulated P-sites in SCZ targets affected by Ng knockdown.

|                        | Gene    | Phosphorylation sites*       |
|------------------------|---------|------------------------------|
| Down-regulated P-sites | ALDOA   | S414                         |
|                        | HCN1    | S99                          |
|                        | GRIN2A  | S1384                        |
|                        | SMG6    | S239                         |
|                        | SNAP91  | T788                         |
|                        | PRKD1   | S427/Y438/T439               |
|                        | RANBP10 | S365/S367, S369              |
|                        | TBC1D5  | T728, S565/S568              |
|                        | CNKSR2  | S109, S488, S928, S936       |
|                        | HIRIP3  | T391                         |
|                        | KDM4A   | T361                         |
|                        | BAG5    | S298                         |
|                        | ZDHHC5  | S415, S577                   |
|                        | TMX2    | S187                         |
|                        | TCF20   | S567, S1395                  |
|                        | R3HDM2  | S347, S383/T389              |
|                        | PLCL1   | T94/S96                      |
|                        | DOC2A   | S226                         |
| Up-regulated P-sites   | ALDOA   | S90                          |
|                        | ATP2A2  | S186, S378, T441, T537, S553 |
|                        | GRIN2A  | S882/S890                    |
|                        | INA     | S274, S441                   |
|                        | VPS45   | T540                         |
|                        | PLCL1   | S1080                        |
|                        | SNAP91  | S248, S296/S300/S303         |
|                        | PRKD1   | S203, S718                   |
|                        | MAPK3   | T203/Y205                    |
|                        | GIGYF2  | T383                         |
|                        | CNKSR2  | S12, S325/T332/S338, S430    |
|                        | SATB2   | S13                          |
|                        | TMX2    | S274                         |
|                        | MPP6    | S197                         |
|                        | CUL3    | S478                         |
| RFTN2                  | S429    |                              |
| PSMA4                  | T185    |                              |

\*Slash (/) indicates that the exact phosphorylation sites could not be unambiguously determined due to the presence of multiple potential phosphorylation sites on a single peptide. Multiple sites without (/) indicate multiple simultaneous phosphorylation within the phosphopeptide.
